# Supplementary material
Source: PubMed Central journal article supplement (PMC4009699)
Supplement: halms906774-supplement_1.pdf [file halms906774-supplement_1.pdf]

**TABLE S1 : Genes overexpressed in osteoclasts**

| Gene ID           | Chip  | Gene Name | Ratio Osteoclasts vs memory B cells | Osteoclasts vs memory B cells q-value(%) | Ratio Osteoclasts vs BMPC | Osteoclasts vs BMPC value(%) | Ratio Osteoclasts vs CD14 | Osteoclasts vs CD14 q-value(%) | Ratio Osteoclasts vs CD15 | Osteoclasts vs CD15 q-value(%) | Ratio Osteoclasts vs CD3 | Osteoclasts vs CD3 q-value(%) | Ratio Osteoclasts vs CD34 | Osteoclasts vs CD34 value(%) | Ratio Osteoclasts vs MMC | Osteoclasts vs MMC q-value(%) | Ratio Osteoclasts vs Stromal cells | Osteoclasts vs Stromal cells value(%) |  |
|-------------------|-------|-----------|-------------------------------------|------------------------------------------|---------------------------|------------------------------|---------------------------|--------------------------------|---------------------------|--------------------------------|--------------------------|-------------------------------|---------------------------|------------------------------|--------------------------|-------------------------------|------------------------------------|---------------------------------------|--|
| <b>Metabolism</b> |       |           |                                     |                                          |                           |                              |                           |                                |                           |                                |                          |                               |                           |                              |                          |                               |                                    |                                       |  |
| 217757_at         | U133P | A2M       | 46,57463284                         | 0,049790445                              | 3,09720151                | 0,365048611                  | 48,7049034                | 0                              | 274,42102                 | 0                              | 79,4560086               | 0,07828345                    | 198,38717                 | 0,16096585                   | 20,2200163               | 0                             | 40,14623293                        | 0                                     |  |
| 221552_at         | U133P | ABHD6     | 24,36040495                         | 0,049790445                              | 15,7615721                | 0,166012851                  | 4,48684799                | 0                              | 40,2834821                | 0                              | 10,5316293               | 0,07828345                    | 15,6821342                | 0,16096585                   | 8,47897615               | 0                             | 6,634723201                        | 0                                     |  |
| 221679_s_at       | U133P | ABHD6     | 4,340922496                         | 0,049790445                              | 2,0101606                 | 0,166012851                  | 2,61067597                | 0                              | 5,30995671                | 0                              | 3,60552616               | 0,07828345                    | 5,08793761                | 0,16096585                   | 2,92846991               | 0                             | 4,531773399                        | 0                                     |  |
| 45288_at          | U133P | ABHD6     | 11,8234749                          | 0,049790445                              | 6,59065083                | 0,166012851                  | 4,80439039                | 0                              | 29,1645714                | 0                              | 7,35884422               | 0,07828345                    | 8,05829228                | 0,16096585                   | 7,14464942               | 0                             | 7,029866165                        | 0                                     |  |
| 214763_at         | U133P | ACOT11    | 2,697959184                         | 0,049790445                              | 2,78064904                | 0,278829014                  | 2,75646372                | 0                              | 3,28528827                | 0                              | 4,98491704               | 0,07828345                    | 3,11205273                | 0,16096585                   | 3,24132206               | 0                             | 2,919396393                        | 0                                     |  |
| 206134_at         | U133P | ADAMDEC1  | 96,72530395                         | 0,049790445                              | 112,249118                | 0,166012851                  | 84,8546764                | 0                              | 210,710975                | 0                              | 281,491597               | 0,07828345                    | 324,720663                | 0,16096585                   | 137,277142               | 0                             | 480,6438011                        | 0                                     |  |
| 201272_at         | U133P | AKR1B1    | 6,717195642                         | 0,049790445                              | 3,91311204                | 0,166012851                  | 6,4171607                 | 0                              | 66,6040395                | 0                              | 4,22904861               | 0,07828345                    | 3,39128979                | 0,16096585                   | 5,76985122               | 0                             | 3,551770563                        | 0                                     |  |
| 202053_s_at       | U133P | ALDH3A2   | 8,010257259                         | 0,049790445                              | 3,53700051                | 0,166012851                  | 4,05442974                | 0                              | 6,26981249                | 0                              | 5,86323399               | 0,07828345                    | 7,00086755                | 0,16096585                   | 3,24954308               | 0                             | 4,465009049                        | 0                                     |  |
| 202054_s_at       | U133P | ALDH3A2   | 21,48105495                         | 0,049790445                              | 9,20639765                | 0,166012851                  | 3,87955836                | 0                              | 11,1858983                | 0                              | 6,70560825               | 0,07828345                    | 6,2523221                 | 0,16096585                   | 4,72108207               | 0                             | 2,69846853                         | 0                                     |  |
| 210544_s_at       | U133P | ALDH3A2   | 3,909507402                         | 0,049790445                              | 4,44677003                | 0,166012851                  | 5,2218109                 | 0                              | 4,0662067                 | 0                              | 5,88986241               | 0,07828345                    | 4,90117339                | 0,16096585                   | 3,74489298               | 0                             | 4,570188481                        | 0                                     |  |
| 1555416_a_a       | U133P | ALOX15B   | 7,140564879                         | 0,094925271                              | 12,1141667                | 0,166012851                  | 9,80507217                | 0                              | 25,325784                 | 0                              | 14,2631476               | 0,07828345                    | 20,7256915                | 0,16096585                   | 11,1726982               | 0                             | 4,317571222                        | 0                                     |  |
| 206714_at         | U133P | ALOX15B   | 4,252386738                         | 0,050622381                              | 11,3506751                | 0,166012851                  | 5,81127242                | 0,132499772                    | 14,3464512                | 0                              | 12,0229682               | 0,07828345                    | 8,66143403                | 0,16096585                   | 6,75500234               | 0                             | 22,7994416                         | 0                                     |  |
| 239449_at         | U133P | ANKH      | 2,900685953                         | 0,71232465                               | 6,81092437                | 0,166012851                  | 19,7924298                | 0                              | 6,40584865                | 0                              | 2,85538136               | 0,854441                      | 5,04512916                | 0,16096585                   | 2,97239017               | 0,00844097                    | 3,281791725                        | 0,003674049                           |  |
| 205423_at         | U133P | AP1B1     | 4,204327225                         | 0,049790445                              | 2,90862414                | 0,166012851                  | 3,03735005                | 0                              | 6,02107728                | 0                              | 6,70794364               | 0,07828345                    | 3,15829758                | 0,16096585                   | 5,56391384               | 0                             | 6,66394178                         | 0                                     |  |
| 211779_x_at       | U133P | AP2A2     | 11,99747435                         | 0,049790445                              | 5,71917327                | 0,166012851                  | 10,3380547                | 0                              | 15,6271075                | 0                              | 10,7502122               | 0,07828345                    | 8,54848385                | 0,16096585                   | 8,10570628               | 0                             | 7,660663889                        | 0                                     |  |
| 212159_x_at       | U133P | AP2A2     | 14,70722135                         | 0,049790445                              | 5,51493745                | 0,166012851                  | 10,7975566                | 0                              | 15,1426416                | 0                              | 10,9357795               | 0,07828345                    | 9,52906474                | 0,16096585                   | 9,00391244               | 0                             | 7,730892879                        | 0                                     |  |
| 212161_at         | U133P | AP2A2     | 14,92935636                         | 0,049790445                              | 17,6437848                | 0,166012851                  | 8,45934887                | 0                              | 8,48753496                | 0                              | 4,72382277               | 0,07828345                    | 8,32118066                | 0,16096585                   | 16,0710294               | 0                             | 8,160949679                        | 0                                     |  |
| 215764_x_at       | U133P | AP2A2     | 10,48544664                         | 0,049790445                              | 5,87664738                | 0,166012851                  | 7,40921986                | 0                              | 10,8845593                | 0                              | 9,19630282               | 0,07828345                    | 7,66133764                | 0,16096585                   | 10,03471843              | 0                             | 7,773065476                        | 0                                     |  |
| 206129_s_at       | U133P | ARSB      | 5,292641108                         | 0,049790445                              | 2,75240745                | 0,166012851                  | 3,02507173                | 0                              | 4,52791166                | 0                              | 9,38421129               | 0,07828345                    | 5,88166356                | 0,16096585                   | 2,78000272               | 0                             | 2,099318562                        | 0,003674049                           |  |
| 1554030_at        | U133P | ARSB      | 3,715930113                         | 0,094925271                              | 2,42267489                | 0,166012851                  | 2,70369706                | 0,132499772                    | 3,26411964                | 0                              | 6,05668722               | 0,07828345                    | 4,6320237                 | 0,16096585                   | 2,98364904               | 0                             | 2,691112986                        | 0                                     |  |
| 1553151_at        | U133P | ATP6V0D2  | 26,73751854                         | 0,049790445                              | 7,1547619                 | 0,166012851                  | 49,532967                 | 0                              | 30,0901202                | 0                              | 63,7553041               | 0,07828345                    | 31,7206193                | 0,16096585                   | 14,5864494               | 0                             | 38,25318246                        | 0                                     |  |
| 1553155_x_a       | U133P | ATP6V0D2  | 5,304458886                         | 0,049790445                              | 6,36597241                | 0,166012851                  | 7,8960612                 | 0                              | 6,62621769                | 0                              | 9,68359118               | 0,07828345                    | 11,8218807                | 0,16096585                   | 7,73662631               | 0                             | 21,52919652                        | 0                                     |  |
| 202874_s_at       | U133P | ATP6V1C1  | 22,01324726                         | 0,049790445                              | 6,83192223                | 0,166012851                  | 5,35333432                | 0                              | 3,23380402                | 0                              | 14,718294                | 0,07828345                    | 9,07237244                | 0,16096585                   | 6,95011333               | 0                             | 4,973475457                        | 0                                     |  |
| 202201_at         | U133P | BLVRR     | 33,69183399                         | 0,049790445                              | 4,85952203                | 0,166012851                  | 2,16410586                | 0,132499772                    | 16,206954                 | 0                              | 22,1685618               | 0,07828345                    | 10,8195931                | 0,16096585                   | 9,95574369               | 0                             | 8,569911115                        | 0                                     |  |
| 226853_at         | U133P | BMP2K     | 10,1442937                          | 0,049790445                              | 3,89854006                | 0,166012851                  | 5,47367841                | 0                              | 9,47322919                | 0                              | 33,626455                | 0,07828345                    | 3,65740528                | 0,16096585                   | 9,98840946               | 0                             | 9,198726299                        | 0                                     |  |
| 37170_at          | U133P | BMP2K     | 4,740229668                         | 0,049790445                              | 2,6591379                 | 0,166012851                  | 2,26549584                | 0,593812245                    | 3,27791067                | 0                              | 15,7538636               | 0,07828345                    | 2,09168481                | 0,16096585                   | 6,00558926               | 0                             | 6,730725357                        | 0                                     |  |
| 209301_at         | U133P | CA2       | 18,48492063                         | 0,049790445                              | 12,7761931                | 0,166012851                  | 6,70418238                | 0,593812245                    | 6,00132333                | 0,06059553                     | 14,8672284               | 0,07828345                    | 8,47932139                | 0,1723588                    | 11,7359686               | 0                             | 66,54571429                        | 0                                     |  |
| 201850_at         | U133P | CAPG      | 10,08871279                         | 0,049790445                              | 22,9956063                | 0,166012851                  | 2,3731032                 | 0                              | 2,50352375                | 0                              | 34,8228702               | 0,07828345                    | 16,063142                 | 0,16096585                   | 38,9093413               | 0                             | 25,01395736                        | 0                                     |  |
| 219082_at         | U133P | CGI-14    | 4,453491742                         | 0,225862787                              | 2,24152284                | 0,278829014                  | 9,38278388                | 0                              | 2,65646876                | 0                              | 3,34639754               | 0,07828345                    | 6,83978638                | 0,16096585                   | 5,23800936               | 0                             | 12,2315957                         | 0                                     |  |
| 200884_at         | U133P | CKB       | 10,4295837                          | 0,049790445                              | 3,20782253                | 0,441369819                  | 12,6449742                | 0                              | 8,4956771                 | 0                              | 8,71447602               | 0,07828345                    | 3,55010854                | 0,16096585                   | 3,36877995               | 0                             | 2,120761853                        | 0,265330828                           |  |
| 219341_at         | U133P | CLN8      | 8,230729702                         | 0,049790445                              | 24,5471264                | 0,166012851                  | 41,9073783                | 0                              | 29,0005432                | 0                              | 37,2055749               | 0,07828345                    | 7,04911539                | 0,16096585                   | 37,2986963               | 0                             | 7,002732539                        | 0,003674049                           |  |
| 222874_s_at       | U133P | CLN8      | 12,83641536                         | 0,049790445                              | 19,299725                 | 0,166012851                  | 5,63929509                | 0                              | 9,59183673                | 0                              | 10,0199867               | 0,07828345                    | 4,61916462                | 0,16096585                   | 15,304515                | 0                             | 5,796691826                        | 0                                     |  |
| 223912_s_at       | U133P | CLN8      | 4,087028871                         | 0,094925271                              | 5,099346                  | 0,166012851                  | 5,42472833                | 0                              | 8,70216837                | 0                              | 16,3576424               | 0,07828345                    | 5,42472833                | 0,16096585                   | 3,89070832               | 0                             | 2,695900335                        | 0,003674049                           |  |
| 219340_s_at       | U133P | CLN8      | 6,659406965                         | 0,049790445                              | 7,59367014                | 0,166012851                  | 5,65876597                | 0                              | 11,8931165                | 0                              | 8,20706212               | 0,07828345                    | 5,51622208                | 0,16096585                   | 11,6347167               | 0                             | 3,994760382                        | 0                                     |  |
| 223281_s_at       | U133P | COX15     | 4,541892706                         | 0,049790445                              | 4,29442608                | 0,166012851                  | 4,04976889                | 0                              | 4,61511135                | 0                              | 4,64378159               | 0,07828345                    | 2,21287018                | 0,61390985                   | 3,84726563               | 0                             | 4,345402293                        | 0                                     |  |
| 206100_at         | U133P | CPM       | 94,13824885                         | 0,049790445                              | 32,0690738                | 0,166012851                  | 11,2675124                | 0                              | 108,659574                | 0                              | 169,10596                | 0,07828345                    | 537,578947                | 0,16096585                   | 190,705381               | 0                             | 294,2809124                        | 0                                     |  |
| 217542_at         | U133P | CPM       | 9,431268967                         | 0,049790445                              | 3,2767104                 | 0,166012851                  | 8,95900064                | 0                              | 4,94764027                | 0                              | 8,45832829               | 0,07828345                    | 25,1619288                | 0,16096585                   | 2,43297685               | 0                             | 2,276544081                        | 0,003674049                           |  |
| 235019_at         | U133P | CPM       | 21,366538274                        | 0,049790445                              | 23,7895765                | 0,166012851                  | 6,95747437                | 0                              | 39,1645217                | 0                              | 48,8456394               | 0,07828345                    | 66,9668073                | 0,16096585                   | 38,3870858               | 0                             | 70,73510896                        | 0                                     |  |
| 235706_at         | U133P | CPM       | 17,60887656                         | 0,049790445                              | 11,8132296                | 0,166012851                  | 8,2728716                 | 0                              | 35,0260835                | 0                              | 34,1858416               | 0,07828345                    | 96,8488211                | 0,16096585                   | 20,6023455               | 0                             | 58,50691244                        | 0                                     |  |
| 241765_at         | U133P | CPM       | 12,72561198                         | 0,049790445                              | 9,44670464                | 0,166012851                  | 5,52120982                | 0                              | 23,2945425                | 0                              | 35,8998145               | 0,07828345                    | 30,9434968                | 0,16096585                   | 13,8833754               | 0                             | 31,54177043                        | 0                                     |  |
| 243403_x_at       | U133P | CPM       | 10,80525942                         | 0,049790445                              | 8,66267806                | 0,166012851                  | 6,93440978                | 0                              | 17,4867725                | 0                              | 21,9158138               | 0,07828345                    | 23,203602                 | 0,16096585                   | 13,6859113               | 0                             | 46,33295238                        | 0                                     |  |
| 220753_s_at       | U133P | CRYL1     | 5,43146957                          | 0,049790445                              | 3,37124054                | 0,166012851                  | 3,88181625                | 0                              | 9,5835516                 | 0                              | 5,14989444               | 0,07828345                    | 3,62564407                | 0,16096585                   | 4,9593174                | 0                             | 4,883817899                        | 0                                     |  |
| 201201_at         | U133P | CSTB      | 20,75701953                         | 0,049790445                              | 3,98809413                | 0,166012851                  | 2,77127464                | 0                              | 3,1561806                 | 0                              | 5,60766238               | 0,07828345                    | 5,34617328                | 0,16096585                   | 5,05288373               | 0                             | 3,296818931                        | 0                                     |  |
| 213274_s_at       | U133P | CTSB      | 65,16323676                         | 0,049790445                              | 12,0927697                | 0,166012851                  | 5,74993389                | 0                              | 43,2686797                | 0                              | 43,7727492               | 0,07828345                    | 49,5656535                | 0,16096585                   | 32,1482778               | 0                             | 5,770705483                        | 0                                     |  |
| 213275_x_at       | U133P | CTSB      | 13,91947195                         | 0,049790445                              | 3,86307966                | 0,166012851                  | 3,0825452                 | 0                              | 17,3193167                | 0                              | 13,2404094               | 0,07828345                    | 17,638006                 | 0,16096585                   | 15,5229133               | 0                             |                                    |                                       |  |

|             |       |              |              |             |            |             |            |             |             |            |            |            |            |            |            |             |             |             |
|-------------|-------|--------------|--------------|-------------|------------|-------------|------------|-------------|-------------|------------|------------|------------|------------|------------|------------|-------------|-------------|-------------|
| 238053_at   | U133P | DHRSX        | 3,812559059  | 0,049790445 | 2,34082278 | 0,441369819 | 3,02090991 | 0           | 2,11258354  | 0,06059553 | 3,8203698  | 0,07828345 | 2,53652013 | 0,16096585 | 2,62560825 | 0           | 2,654505218 | 0           |
| 214992_s_at | U133P | DNASE2       | 3,773892311  | 0,094925271 | 2,46163815 | 0,441369819 | 4,4954085  | 0           | 6,26368553  | 0          | 5,80785225 | 0,07828345 | 7,05886725 | 0,16096585 | 3,37292918 | 0           | 6,083920564 | 0           |
| 201537_s_at | U133P | DUSP3        | 9,64411518   | 0,049790445 | 9,82820513 | 0,166012851 | 2,57559468 | 0,318779683 | 15,979711   | 0          | 29,9765381 | 0,07828345 | 2,61745425 | 0,16096585 | 6,72787624 | 0           | 2,503183673 | 0           |
| 219424_at   | U133P | EBI3         | 15,25188765  | 0,049790445 | 20,8458204 | 0,166012851 | 105,469925 | 0           | 74,4493587  | 0          | 128,594347 | 0,07828345 | 82,6362297 | 0,16096585 | 38,7931044 | 0           | 152,6802721 | 0           |
| 203348_s_at | U133P | ETV5         | 4,361699145  | 0,049790445 | 3,19228401 | 0,166012851 | 8,87494295 | 0           | 9,36093393  | 0          | 15,2221135 | 0,07828345 | 8,79764732 | 0,16096585 | 3,00878751 | 0           | 3,620340561 | 0           |
| 203305_at   | U133P | F13A1        | 46,60634658  | 0,049790445 | 40,6663785 | 0,166012851 | 2,87561576 | 0           | 42,7111982  | 0          | 75,0855227 | 0,07828345 | 25,6656413 | 0,16096585 | 79,6371433 | 0           | 272,1325251 | 0           |
| 202862_at   | U133P | FAH          | 17,28846711  | 0,049790445 | 8,5888577  | 0,166012851 | 7,61681348 | 0           | 13,0444051  | 0          | 14,3054956 | 0,07828345 | 3,11043511 | 0,16096585 | 7,00892727 | 0           | 4,46765474  | 0           |
| 226184_at   | U133P | FMNL2        | 29,99546005  | 0,049790445 | 4,94092133 | 0,166012851 | 7,30879002 | 0           | 35,9154164  | 0          | 45,0313522 | 0,07828345 | 23,4790334 | 0,16096585 | 6,0002131  | 0           | 4,693082669 | 0           |
| 242665_at   | U133P | FMNL2        | 12,83820896  | 0,049790445 | 19,136537  | 0,166012851 | 11,0344828 | 0           | 19,6276013  | 0          | 38,2089552 | 0,07828345 | 15,8724535 | 0,16096585 | 8,58985827 | 0           | 7,682743837 | 0           |
| 202838_at   | U133P | FUCA1        | 59,10979189  | 0,049790445 | 6,57507027 | 0,166012851 | 11,779326  | 0           | 43,585304   | 0          | 46,0720572 | 0,07828345 | 39,6015237 | 0,16096585 | 13,6732054 | 0           | 25,39791415 | 0           |
| 202812_at   | U133P | GAA          | 13,16872542  | 0,049790445 | 6,65756532 | 0,166012851 | 2,8276337  | 0,132499772 | 7,25500787  | 0          | 12,7056277 | 0,07828345 | 9,36215207 | 0,16096585 | 8,2086619  | 0           | 7,988742807 | 0           |
| 202922_at   | U133P | GCLC         | 5,33088346   | 0,049790445 | 5,18832411 | 0,166012851 | 3,97500198 | 0           | 10,4687826  | 0          | 3,57720418 | 0,07828345 | 3,8883076  | 0,16096585 | 5,78308615 | 0           | 5,410533979 | 0           |
| 202923_s_at | U133P | GCLC         | 15,24855017  | 0,049790445 | 6,41058325 | 0,166012851 | 5,93412287 | 0           | 16,2329975  | 0          | 6,14191077 | 0,07828345 | 5,46016522 | 0,16096585 | 6,61289864 | 0           | 12,5855573  | 0           |
| 214430_at   | U133P | GLA          | 6,814222377  | 0,049790445 | 5,05852417 | 0,166012851 | 2,28080589 | 0           | 2,76241225  | 0          | 10,5032963 | 0,07828345 | 2,3010533  | 0,16096585 | 3,17892986 | 0           | 4,56583661  | 0           |
| 222644_s_at | U133P | GLT25D1      | 3,160861057  | 0,049790445 | 19,1942959 | 0,166012851 | 2,19755102 | 0,132499772 | 2,20069487  | 0          | 4,36764825 | 0,07828345 | 4,70711663 | 0,16096585 | 7,50498581 | 0           | 2,570951055 | 0           |
| 217202_s_at | U133P | GLUL         | 51,333871235 | 0,049790445 | 15,7667006 | 0,166012851 | 4,67382904 | 0           | 3,36996504  | 0          | 33,300856  | 0,07828345 | 13,1610309 | 0,16096585 | 29,0670574 | 0           | 31,78696322 | 0           |
| 209727_at   | U133P | GM2A         | 20,0945021   | 0,049790445 | 5,71299435 | 0,166012851 | 7,68389058 | 0           | 39,2546584  | 0          | 42,487395  | 0,07828345 | 41,831219  | 0,16096585 | 6,16978358 | 0           | 16,74326189 | 0           |
| 212737_at   | U133P | GM2A         | 16,86358065  | 0,049790445 | 4,92748695 | 0,166012851 | 3,97917779 | 0           | 13,9896762  | 0          | 27,425943  | 0,07828345 | 12,8223656 | 0,16096585 | 4,69200464 | 0           | 11,26539866 | 0           |
| 215891_s_at | U133P | GM2A         | 27,3339342   | 0,049790445 | 3,20066331 | 0,166012851 | 3,38365243 | 0           | 10,4648033  | 0          | 20,0575397 | 0,07828345 | 25,3358396 | 0,16096585 | 4,58733255 | 0           | 10,53478072 | 0           |
| 235678_at   | U133P | GM2A         | 11,53165995  | 0,049790445 | 8,05352763 | 0,166012851 | 3,28559656 | 0           | 17,9274794  | 0          | 28,0779678 | 0,07828345 | 17,9516949 | 0,16096585 | 8,14676446 | 0           | 20,75698791 | 0           |
| 35820_at    | U133P | GM2A         | 33,25523408  | 0,049790445 | 5,57441197 | 0,166012851 | 3,72228317 | 0           | 21,020152   | 0          | 52,5923962 | 0,07828345 | 14,0017159 | 0,16096585 | 5,28759442 | 0           | 13,93005709 | 0           |
| 33646_g_at  | U133P | GM2A         | 4,352191832  | 0,094925271 | 3,17525773 | 0,166012851 | 3,17793828 | 0           | 7,43471582  | 0          | 10,8277405 | 0,07828345 | 8,77606528 | 0,16096585 | 3,36907878 | 0           | 9,596034696 | 0           |
| 202382_s_at | U133P | GNPDA1       | 51,7852068   | 0,049790445 | 8,93994349 | 0,166012851 | 9,55990673 | 0           | 17,3294528  | 0          | 9,35626951 | 0,07828345 | 20,5505543 | 0,16096585 | 11,0315454 | 0           | 6,767461814 | 0           |
| 203676_at   | U133P | GNS          | 9,017142857  | 0,094925271 | 10,9250253 | 0,166012851 | 3,39301447 | 0,940698927 | 5,80417698  | 0,06059553 | 9,98980915 | 0,07828345 | 11,8677086 | 0,16096585 | 5,88409614 | 0           | 5,823926546 | 0           |
| 204324_s_at | U133P | GOLPH4       | 11,02309666  | 0,049790445 | 6,98302023 | 0,166012851 | 6,14624217 | 0           | 21,4718951  | 0          | 40,6071429 | 0,07828345 | 2,8661882  | 0,16096585 | 0,5514082  | 0,316718404 | 0           | 0,01266797  |
| 201348_at   | U133P | GPX3         | 7,204680781  | 0,049790445 | 3,87061537 | 0,278829014 | 3,24943958 | 0,318779683 | 2,41682455  | 0,60581622 | 10,9829178 | 0,07828345 | 14,1922653 | 0,16096585 | 4,48584808 | 0           | 3,787223514 | 0,003674049 |
| 214091_s_at | U133P | GPX3         | 4,02782264   | 0,049790445 | 2,06445423 | 0,526749774 | 2,80574988 | 0           | 2,2725917   | 0,06059553 | 4,17900558 | 0,07828345 | 6,70270468 | 0,16096585 | 2,55102763 | 0           | 3,441177854 | 0,003674049 |
| 212090_at   | U133P | GRINA        | 7,975505411  | 0,049790445 | 3,41840147 | 0,441369819 | 3,61904762 | 0,940698927 | 4,35916481  | 0,06059553 | 9,98110355 | 0,07828345 | 8,49423747 | 0,16096585 | 4,51626238 | 0           | 6,633594976 | 0           |
| 214500_at   | U133P | H2AFY        | 56,61950815  | 0,049790445 | 45,9018817 | 0,166012851 | 2,45136885 | 0           | 15,57203262 | 0          | 21,8384704 | 0,07828345 | 2,67502702 | 0,16096585 | 41,5613573 | 0           | 6,171031035 | 0           |
| 220387_s_at | U133P | HHLA3        | 5,554899646  | 0,049790445 | 2,43278118 | 0,278829014 | 18,4654631 | 0           | 20,4921603  | 0          | 8,9143615  | 0,07828345 | 3,85403014 | 0,16096585 | 3,43136805 | 0           | 2,698465803 | 0           |
| 204112_s_at | U133P | HNM1         | 112,1644765  | 0,049790445 | 4,97435705 | 0,166012851 | 2,18433201 | 0           | 82,6036446  | 0          | 267,701335 | 0,07828345 | 28,4891684 | 0,16096585 | 78,3375886 | 0           | 4,161023235 | 0           |
| 228772_at   | U133P | HNM1         | 58,39736842  | 0,049790445 | 7,33829365 | 0,166012851 | 3,47309607 | 0           | 139,041353  | 0          | 103,022284 | 0,07828345 | 68,4907407 | 0,16096585 | 59,7937114 | 0           | 3,907898213 | 0           |
| 204111_at   | U133P | HNM1         | 2,063664596  | 0,225862787 | 4,57290323 | 0,166012851 | 2,86989661 | 0           | 6,99289661  | 0          | 6,57513915 | 0,07828345 | 5,20870076 | 0,16096585 | 2,95882774 | 0           | 3,099708455 | 0,003674049 |
| 205466_s_at | U133P | HS3T1        | 11,24947735  | 0,049790445 | 11,9977703 | 0,166012851 | 86,3723917 | 0           | 80,9172932  | 0          | 311,640927 | 0,07828345 | 24,797235  | 0,16096585 | 31,7382036 | 0           | 28,79678906 | 0           |
| 208744_x_at | U133P | HSPH1        | 13,92345832  | 0,049790445 | 28,3924171 | 0,166012851 | 44,9489796 | 0           | 118,208366  | 0          | 12,8194813 | 0,20150297 | 4,00894028 | 0,16390985 | 7,14634751 | 0           | 5,578458912 | 0,01266797  |
| 1555037_a_a | U133P | IDH1         | 81,91727494  | 0,049790445 | 8,40679175 | 0,166012851 | 4,35718908 | 0           | 16,8390517  | 0          | 42,2540161 | 0,07828345 | 7,66785096 | 0,16096585 | 11,7616982 | 0           | 4,043516118 | 0           |
| 201193_at   | U133P | IDH1         | 73,91377634  | 0,049790445 | 8,51943893 | 0,166012851 | 3,53538736 | 0           | 11,9584644  | 0          | 32,8413412 | 0,07828345 | 5,10449686 | 0,16096585 | 9,70749446 | 0           | 3,092291106 | 0           |
| 205306_x_at | U133P | KMO          | 8,253216935  | 0,049790445 | 5,9837559  | 0,166012851 | 7,04312327 | 0           | 55,1578308  | 0          | 32,5053661 | 0,07828345 | 37,3718124 | 0,16096585 | 4,91477039 | 0           | 95,1253419  | 0           |
| 211138_s_at | U133P | KMO          | 7,97545983   | 0,049790445 | 4,80956897 | 0,166012851 | 6,36898103 | 0           | 34,4729362  | 0          | 27,5212115 | 0,07828345 | 42,0810077 | 0,16096585 | 4,61092246 | 0           | 76,2930964  | 0           |
| 242019_at   | U133P | LASS6        | 10,75997099  | 0,049790445 | 5,83254717 | 0,166012851 | 3,91669306 | 0           | 12,3526474  | 0          | 6,04941292 | 0,07828345 | 3,51178642 | 0,16096585 | 5,32359821 | 0           | 4,256454389 | 0           |
| 201212_at   | U133P | LGMN         | 27,90806592  | 0,049790445 | 3,22834152 | 0,166012851 | 60,5890897 | 0           | 194,110651  | 0          | 54,0936599 | 0,07828345 | 190,370183 | 0,16096585 | 14,7047519 | 0           | 4,435024021 | 0           |
| 228825_at   | U133P | LTB4DH       | 4,528829604  | 0,049790445 | 4,20411424 | 0,166012851 | 6,33082707 | 0           | 3,67531515  | 0          | 5,68673006 | 0,07828345 | 6,7606629  | 0,16096585 | 5,47709877 | 0           | 3,211044161 | 0           |
| 204458_at   | U133P | LYPLA3       | 15,04019427  | 0,049790445 | 4,31775566 | 0,166012851 | 7,36299685 | 0           | 21,9079333  | 0          | 14,7666732 | 0,07828345 | 5,54803914 | 0,16096585 | 5,78166442 | 0           | 5,463338961 | 0           |
| 204970_s_at | U133P | MAFG         | 4,793761176  | 0,049790445 | 3,49768049 | 0,166012851 | 3,95991991 | 0           | 3,11559546  | 0          | 16,7723323 | 0,07828345 | 2,24849259 | 0,16096585 | 3,57138953 | 0           | 3,59905081  | 0           |
| 201668_x_at | U133P | MARCKS       | 4,007941699  | 0,415272173 | 3,38197729 | 0,441369819 | 5,55991912 | 0,132499772 | 5,01895402  | 0,16036085 | 32,3214286 | 0,07828345 | 5,1956845  | 0,16096585 | 3,96686006 | 0           | 2,432285317 | 0,05204955  |
| 204058_at   | U133P | ME1          | 64,69212636  | 0,049790445 | 10,6796389 | 0,166012851 | 23,4022377 | 0           | 100,080746  | 0          | 105,159411 | 0,07828345 | 129,640967 | 0,16096585 | 20,4204623 | 0           | 2,156957886 | 0,095721731 |
| 204059_s_at | U133P | ME1          | 50,43544749  | 0,049790445 | 12,6656444 | 0,166012851 | 11,5858947 | 0           | 121,684185  | 0          | 51,4376599 | 0,07828345 | 63,0200429 | 0,16096585 | 16,3326115 | 0           | 2,873773688 | 0           |
| 231283_at   | U133P | MGAT4A       | 20,79868774  | 0,049790445 | 7,22374145 | 0,166012851 | 24,8939816 | 0           | 5,37007947  | 0          | 2,25970138 | 0,07828345 | 16,3267313 | 0,16096585 | 14,4622748 | 0           | 81,3271137  | 0           |
| 211026_s_at | U133P | MGLL         | 9,455312693  | 0,049790445 | 4,52655711 | 0,166012851 | 12,2437968 | 0           | 9,2556391   | 0          | 15,8060861 | 0,07828345 | 3,22915047 | 0,16096585 | 8,73870216 | 0           | 4,264267004 | 0           |
| 225102_at   | U133P | MGLL         | 10,05022754  | 0,049790445 | 2,36755947 | 0,166012851 | 12,2479625 | 0           | 9,16958848  | 0          | 23,7523901 | 0,07828345 | 2,83311477 | 0,16096585 | 5,11665788 | 0           | 2,580293392 | 0           |
| 204438_at   | U133P | MRC1 /// MRC | 116          |             |            |             |            |             |             |            |            |            |            |            |            |             |             |             |

|                                                          |       |          |              |             |            |               |            |             |            |            |            |            |            |            |             |   |             |   |
|----------------------------------------------------------|-------|----------|--------------|-------------|------------|---------------|------------|-------------|------------|------------|------------|------------|------------|------------|-------------|---|-------------|---|
| 215134_at                                                | U133P | PI4KII   | 4,035511364  | 0,049790445 | 3,40647482 | 0,166012851   | 3,23760684 | 0           | 5,2320442  | 0          | 5,5154339  | 0,07828345 | 5,42382589 | 0,16096585 | 4,8581758   | 0 | 2,924720113 | 0 |
| 209346_s_at                                              | U133P | PI4KII   | 3,89637827   | 0,415272173 | 5,04296875 | 0,278829014   | 4,57412132 | 0,132499772 | 17,7335165 | 0          | 5,85859503 | 0,07828345 | 12,8075397 | 0,16096585 | 3,97556327  | 0 | 4,16317317  | 0 |
| 207469_s_at                                              | U133P | PIR      | 56,96118299  | 0,049790445 | 21,815534  | 0,166012851   | 54,2917548 | 0           | 132,371134 | 0          | 155,636364 | 0,07828345 | 4,839804   | 0,16096585 | 23,825547   | 0 | 4,363611827 | 0 |
| 206214_at                                                | U133P | PLA2G7   | 197,9075542  | 0,049790445 | 14,5960151 | 0,166012851   | 5,28989819 | 0           | 518,096805 | 0          | 273,43998  | 0,07828345 | 431,510763 | 0,16096585 | 111,934423  | 0 | 440,5634366 | 0 |
| 201050_at                                                | U133P | PLD3     | 53,11922399  | 0,049790445 | 4,89653715 | 0,166012851   | 8,30180046 | 0           | 46,2850381 | 0          | 22,4096726 | 0,07828345 | 23,6046585 | 0,16096585 | 9,52917949  | 0 | 11,67719507 | 0 |
| 224950_at                                                | U133P | PTGFRN   | 10,42033513  | 0,049790445 | 12,5952626 | 0,166012851   | 6,81147313 | 0           | 26,1157378 | 0          | 26,5927376 | 0,07828345 | 46,7150497 | 0,16096585 | 12,178887   | 0 | 3,147532546 | 0 |
| 208121_s_at                                              | U133P | PTPRO    | 6,449909292  | 0,049790445 | 10,9186897 | 0,166012851   | 6,89730988 | 0           | 40,9600614 | 0          | 11,8775056 | 0,07828345 | 36,4774282 | 0,16096585 | 8,14129964  | 0 | 47,93707865 | 0 |
| 212398_at                                                | U133P | RDX      | 2,806932084  | 0,225862787 | 2,49783261 | 0,166012851   | 4,97047309 | 0           | 7,0729865  | 0          | 6,18579686 | 0,07828345 | 3,14009054 | 0,16096585 | 2,24745573  | 0 | 2,522682307 | 0 |
| 206617_s_at                                              | U133P | RENBP    | 12,15923567  | 0,049790445 | 22,7649063 | 0,166012851   | 11,3902148 | 0           | 19,2828283 | 0          | 23,1113801 | 0,07828345 | 22,4588235 | 0,16096585 | 14,775902   | 0 | 57,55778894 | 0 |
| 221287_at                                                | U133P | RNASEL   | 5,980519481  | 0,094925271 | 16,6847826 | 0,166012851   | 6,88495178 | 0           | 3,07338072 | 0,16036085 | 6,31492338 | 0,07828345 | 7,50336063 | 0,16096585 | 5,45877115  | 0 | 10,98144422 | 0 |
| 1552256_a_a                                              | U133P | SCARB1   | 7,929492239  | 0,049790445 | 4,03300624 | 0,166012851   | 6,10566405 | 0           | 19,1081995 | 0          | 21,4999049 | 0,07828345 | 3,31480775 | 0,16096585 | 7,28796477  | 0 | 10,13374178 | 0 |
| 201819_at                                                | U133P | SCARB1   | 8,496144295  | 0,049790445 | 2,40088643 | 0,166012851   | 5,42296526 | 0           | 17,3705307 | 0          | 25,6669036 | 0,07828345 | 3,207698   | 0,16096585 | 5,92922429  | 0 | 8,742090576 | 0 |
| 208381_s_at                                              | U133P | SGPL1    | 26           | 0,049790445 | 17,6060606 | 0,166012851   | 11,70282   | 0           | 24,1928251 | 0          | 33,5093168 | 0,07828345 | 30,1396648 | 0,16096585 | 15,5366213  | 0 | 7,002704164 | 0 |
| 212321_at                                                | U133P | SGPL1    | 4,083824519  | 0,049790445 | 7,79216002 | 0,166012851   | 3,22222433 | 0           | 5,87658003 | 0          | 3,09532942 | 0,07828345 | 7,00378169 | 0,16096585 | 8,0117488   | 0 | 3,465277275 | 0 |
| 212322_at                                                | U133P | SGPL1    | 8,640823543  | 0,049790445 | 8,1933406  | 0,166012851   | 4,43866536 | 0           | 7,58349003 | 0          | 5,96589843 | 0,07828345 | 13,7757006 | 0,16096585 | 12,0373413  | 0 | 4,59724716  | 0 |
| 231730_at                                                | U133P | SLA/LP   | 2,561688312  | 0,094925271 | 2,65522463 | 0,166012851   | 3,89535973 | 0           | 7,14285714 | 0          | 4,93711282 | 0,07828345 | 2,58934725 | 0,16096585 | 2,7901479   | 0 | 2,966165414 | 0 |
| 209237_s_at                                              | U133P | SLC23A2  | 2,884241532  | 0,049790445 | 4,47941446 | 0,166012851   | 3,54500036 | 0           | 3,62398224 | 0          | 7,17362637 | 0,07828345 | 5,87755102 | 0,16096585 | 4,83730483  | 0 | 6,685099846 | 0 |
| 209236_at                                                | U133P | SLC23A2  | 2,054553084  | 0,225862787 | 3,31900058 | 0,166012851   | 4,25       | 0           | 4,41240087 | 0          | 3,97273612 | 0,07828345 | 3,40947075 | 0,16096585 | 4,457663126 | 0 | 6,457663126 | 0 |
| 202752_x_at                                              | U133P | SLC7A8   | 29,45151935  | 0,049790445 | 4,40983235 | 0,166012851   | 39,4987825 | 0           | 24,8499396 | 0          | 45,0683028 | 0,07828345 | 50,8357273 | 0,16096585 | 19,3671729  | 0 | 31,99287769 | 0 |
| 216092_s_at                                              | U133P | SLC7A8   | 13,19191837  | 0,049790445 | 6,56994755 | 0,166012851   | 19,7213883 | 0           | 14,9249141 | 0          | 10,6760346 | 0,07828345 | 16,598977  | 0,16096585 | 11,7328718  | 0 | 10,41428088 | 0 |
| 216604_s_at                                              | U133P | SLC7A8   | 7,735279732  | 0,049790445 | 5,38308067 | 0,166012851   | 36,3951142 | 0           | 15,8265207 | 0          | 10,5476037 | 0,07828345 | 12,2716041 | 0,16096585 | 20,4956117  | 0 | 18,4722372  | 0 |
| 216603_at                                                | U133P | SLC7A8   | 6,619860627  | 0,225862787 | 2,43795714 | 0,690451601   | 61,405947  | 0           | 72,9608295 | 0          | 21,782848  | 0,07828345 | 27,932804  | 0,16096585 | 5,04347272  | 0 | 36,55411255 | 0 |
| 219519_s_at                                              | U133P | SN       | 74,30973451  | 0,049790445 | 8,77429467 | 0,166012851   | 9,57905544 | 0           | 126,081081 | 0          | 160,862069 | 0,07828345 | 225,725806 | 0,16096585 | 63,5795028  | 0 | 186,0831025 | 0 |
| 44673_at                                                 | U133P | SN       | 14,97937509  | 0,049790445 | 5,78499231 | 0,166012851   | 6,50929635 | 0           | 17,2056273 | 0          | 22,6434162 | 0,07828345 | 30,1126616 | 0,16096585 | 14,708877   | 0 | 31,38585337 | 0 |
| 203458_at                                                | U133P | SPR      | 50,66796685  | 0,049790445 | 5,66939444 | 0,166012851   | 5,32104455 | 0           | 12,3342563 | 0          | 25,5081001 | 0,07828345 | 27,4311055 | 0,16096585 | 3,28132602  | 0 | 2,21132602  | 0 |
| 213577_at                                                | U133P | SQLE     | 17,23308271  | 0,049790445 | 3,92766421 | 0,166012851   | 12,5842958 | 0           | 14,3165785 | 0          | 10,7673431 | 0,07828345 | 2,38511489 | 0,16096585 | 6,18541129  | 0 | 3,475019175 | 0 |
| 206135_at                                                | U133P | ST18     | 4,499690785  | 0,049790445 | 10,2478873 | 0,166012851   | 16,1401952 | 0           | 32,4821429 | 0          | 10,7824541 | 0,07828345 | 3,52587711 | 0,16096585 | 13,31723588 | 0 | 15,2483409  | 0 |
| 1554830_a_a                                              | U133P | STEAP3   | 11,37005164  | 0,049790445 | 6,40737148 | 0,166012851   | 5,92785355 | 0           | 10,1040073 | 0          | 14,3421624 | 0,07828345 | 5,89821429 | 0,16096585 | 4,58131242  | 0 | 2,750685312 | 0 |
| 242408_at                                                | U133P | STYX     | 2,942907891  | 0,415272173 | 5,5867052  | 0,166012851   | 2,82788384 | 0,593812245 | 4,4253663  | 0,06059553 | 2,29736154 | 0,854441   | 3,48006121 | 0,5514082  | 3,41980915  | 0 | 4,065907099 | 0 |
| 212989_at                                                | U133P | TMEM23   | 11,37758105  | 0,049790445 | 4,27155749 | 0,166012851   | 2,07530676 | 0,940698927 | 4,31287946 | 0          | 4,65128833 | 0,07828345 | 8,01486266 | 0,16096585 | 8,48720872  | 0 | 4,160018083 | 0 |
| 200742_s_at                                              | U133P | TPP1     | 12,01889987  | 0,049790445 | 3,06337675 | 0,166012851   | 2,61028556 | 0           | 3,29753094 | 0          | 8,48489721 | 0,07828345 | 5,96217392 | 0,16096585 | 2,79147606  | 0 | 5,699367966 | 0 |
| 224908_s_at                                              | U133P | TTL      | 5,012619889  | 0,049790445 | 16,7788018 | 0,166012851   | 3,00660611 | 0           | 13,9673162 | 0          | 5,96494102 | 0,07828345 | 3,16004166 | 0,16096585 | 2,23025201  | 0 | 2,23025201  | 0 |
| 213073_at                                                | U133P | ZFYVE26  | 3,555248619  | 0,049790445 | 3,67614255 | 0,166012851   | 3,26153066 | 0           | 4,3765586  | 0          | 3,64864865 | 0,07828345 | 2,99581006 | 0,16096585 | 4,37692582  | 0 | 3,957632186 | 0 |
| 37943_at                                                 | U133P | ZFYVE26  | 3,247181035  | 0,049790445 | 2,59688868 | 0,166012851   | 3,6556915  | 0           | 4,52238751 | 0          | 3,58274312 | 0,07828345 | 3,13232271 | 0,16096585 | 4,85506067  | 0 | 3,722963774 | 0 |
| 223392_s_at                                              | U133P | ZNF537   | 4,571428571  | 0,049790445 | 6,12756985 | 0,166012851   | 2,01648018 | 0,318779683 | 2,18037215 | 0,06059553 | 7,48342239 | 0,07828345 | 12,9732143 | 0,16096585 | 7,37850995  | 0 | 2,04346584  | 0 |
| 235179_at                                                | U133P | ZNF641   | 3,89862871   | 0,225862787 | 4,37475653 | 0,278829014   | 2,83142555 | 0,318779683 | 2,06578124 | 0,60581622 | 3,14196184 | 0,22860673 | 4,7718195  | 0,5514082  | 4,22749841  | 0 | 9,368091762 | 0 |
| <b>Intercellular communication and membrane proteins</b> |       |          |              |             |            |               |            |             |            |            |            |            |            |            |             |   |             |   |
| 1568877_a_a                                              | U133P | ACBD5    | 2,730852269  | 0,225862787 | 3,70746996 | 0,166012851   | 3,77383906 | 0,132499772 | 4,06211844 | 0,06059553 | 4,8327205  | 0,07828345 | 4,55619276 | 0,16096585 | 3,45680281  | 0 | 5,920611748 | 0 |
| 206171_at                                                | U133P | ADORA3   | 185,211101   | 0,049790445 | 23,6820244 | 0,166012851   | 85,5742874 | 0           | 58,886478  | 0          | 205,935856 | 0,07828345 | 82,0489358 | 0,16096585 | 80,0217587  | 0 | 180,2364227 | 0 |
| 223860_at                                                | U133P | ADORA3   | 70,15587267  | 0,049790445 | 9,45523713 | 0,166012851   | 16,3524716 | 0           | 11,8910471 | 0          | 228,583691 | 0,07828345 | 216,504065 | 0,16096585 | 48,7866133  | 0 | 347,3478261 | 0 |
| 237904_at                                                | U133P | ADORA3   | 95,08781127  | 0,049790445 | 157,038961 | 0,166012851   | 200,863787 | 0           | 152,869785 | 0          | 200,863787 | 0,07828345 | 246,77551  | 0,16096585 | 156,534733  | 0 | 337,0592334 | 0 |
| 221036_s_at                                              | U133P | APH1B    | 5,711828437  | 0,049790445 | 2,56856127 | 0,166012851   | 2,95125904 | 0           | 2,08559683 | 0          | 6,00025344 | 0,07828345 | 6,41502333 | 0,16096585 | 2,44211924  | 0 | 4,71074837  | 0 |
| 203381_s_at                                              | U133P | APOE     | 36,8305077   | 0,049790445 | 4,56476071 | 0,526749774   | 32,1746611 | 0           | 31,3955026 | 0          | 36,3690476 | 0,07828345 | 28,5857884 | 0,16096585 | 17,2479142  | 0 | 39,16708098 | 0 |
| 203382_s_at                                              | U133P | APOE     | 394,9061224  | 0,049790445 | 4,00895003 | 0,365048611   | 511,915344 | 0           | 527,546347 | 0          | 112,922502 | 0,07828345 | 157,064935 | 0,16096585 | 26,7899473  | 0 | 133,7585253 | 0 |
| 212884_x_at                                              | U133P | APOE     | 13,4710493   | 0,049790445 | 2,99980293 | 0,365048611   | 24,4888766 | 0           | 20,2155189 | 0          | 24,8486544 | 0,07828345 | 22,4054838 | 0,16096585 | 8,29203659  | 0 | 23,80962312 | 0 |
| 225166_at                                                | U133P | ARHGAP18 | 9,098371933  | 0,049790445 | 3,96938776 | 0,166012851   | 3,12508861 | 0           | 4,2459069  | 0          | 3,75482625 | 0,07828345 | 5,85687716 | 0,16096585 | 3,99409815  | 0 | 4,925731666 | 0 |
| 225171_at                                                | U133P | ARHGAP18 | 35,31012758  | 0,049790445 | 4,73001941 | 0,166012851   | 6,71072955 | 0           | 8,09889888 | 0          | 9,5795303  | 0,07828345 | 11,2625847 | 0,16096585 | 4,40729976  | 0 | 3,671546216 | 0 |
| 225173_at                                                | U133P | ARHGAP18 | 42,64819322  | 0,049790445 | 12,6588863 | 0,166012851   | 14,1875529 | 0           | 17,9425295 | 0          | 24,9238445 | 0,07828345 | 16,7252115 | 0,16096585 | 9,47912621  | 0 | 11,74961958 | 0 |
| 207809_s_at                                              | U133P | ATP6AP1  | 7,93231355   | 0,049790445 | 3,72275525 | 0,166012851   | 2,89718187 | 0           | 3,12918584 | 0          | 5,86189933 | 0,07828345 | 4,49132847 | 0,16096585 | 2,69918168  | 0 | 4,481730896 | 0 |
| 212312_at                                                | U133P | BCL2L1   | 11,64695669  | 0,049790445 | 2,50703874 | 0,166012851   | 5,80896574 | 0           | 4,27233934 | 0          | 4,12402402 | 0,07828345 | 3,17804239 | 0,16096585 | 2,01944101  | 0 | 2,276138008 | 0 |
| 218232_at                                                | U133P | C1QA     | 13,519260204 | 0,049790445 | 10,653505  | 0,166012851   | 52,6543367 | 0           | 921,450893 | 0          | 597,19349  | 0,07828345 | 1447,18668 | 0,16096585 | 112,367171  | 0 | 2683,125254 | 0 |
| 202953_at                                                | U133P | C1QB     | 650,7089947  | 0,049790445 | 8,6772218  | 0,166012851</ |            |             |            |            |            |            |            |            |             |   |             |   |

|             |       |         |             |             |            |             |            |             |            |            |            |            |            |            |            |            |              |             |
|-------------|-------|---------|-------------|-------------|------------|-------------|------------|-------------|------------|------------|------------|------------|------------|------------|------------|------------|--------------|-------------|
| 215856_at   | U133P | CD33L3  | 3,530690537 | 0,049790445 | 11,1975666 | 0,166012851 | 2,02657076 | 0,940698927 | 4,84385965 | 0          | 6,11381754 | 0,07828345 | 3,59318064 | 0,16096585 | 8,4452553  | 0          | 6,657022303  | 0           |
| 205988_at   | U133P | CD84    | 6,636427482 | 0,049790445 | 8,895316   | 0,166012851 | 6,08648721 | 0           | 22,2990919 | 0          | 3,77500248 | 0,07828345 | 5,45818495 | 0,16096585 | 15,0982766 | 0          | 70,47396168  | 0           |
| 211192_s_at | U133P | CD84    | 60,23997126 | 0,049790445 | 74,7272727 | 0,166012851 | 24,2562055 | 0           | 208,670981 | 0          | 34,9408235 | 0,07828345 | 35,4580056 | 0,16096585 | 101,80496  | 0          | 288,6196213  | 0           |
| 239026_x_at | U133P | CENTG3  | 3,061519405 | 0,094925271 | 11,268997  | 0,166012851 | 3,62148962 | 0           | 7,3510459  | 0          | 2,63372878 | 0,20150297 | 2,94001031 | 0,16096585 | 4,28963174 | 0          | 3,150292087  | 0           |
| 228707_at   | U133P | CLDN23  | 22,11948928 | 0,049790445 | 3,72970997 | 0,166012851 | 3,0558329  | 0,132499772 | 16,8944579 | 0          | 42,5319622 | 0,07828345 | 14,7314209 | 0,16096585 | 20,9919963 | 0          | 9,877151463  | 0           |
| 219761_at   | U133P | CLEC1A  | 2,009629853 | 0,550622381 | 3,16129032 | 0,166012851 | 3,27256689 | 0           | 3,532212   | 0          | 5,02710027 | 0,07828345 | 5,82417582 | 0,16096585 | 2,40192697 | 0,00844097 | 8,254635352  | 0           |
| 207652_s_at | U133P | CMKLR1  | 3,813351135 | 0,049790445 | 7,50446663 | 0,166012851 | 4,491728   | 0           | 13,4219925 | 0          | 9,47141531 | 0,07828345 | 18,8552944 | 0,16096585 | 5,77300289 | 0          | 13,10584277  | 0           |
| 210659_at   | U133P | CMKLR1  | 12,3320719  | 0,049790445 | 6,29345307 | 0,166012851 | 11,1800124 | 0           | 16,0973622 | 0          | 8,80695638 | 0,07828345 | 20,9135541 | 0,16096585 | 7,91075909 | 0          | 10,78252957  | 0           |
| 221019_s_at | U133P | COLEC12 | 35,1116461  | 0,049790445 | 67,5543424 | 0,166012851 | 41,6046213 | 0           | 74,6201074 | 0          | 107,674419 | 0,07828345 | 78,9845654 | 0,16096585 | 67,8249478 | 0          | 16,72894114  | 0           |
| 240397_x_at | U133P | COLEC12 | 19,8179402  | 0,049790445 | 6,91376912 | 0,365048611 | 18,0239304 | 0           | 22,6160146 | 0          | 27,3131868 | 0,07828345 | 31,7028061 | 0,16096585 | 11,2216179 | 0          | 17,6068477   | 0           |
| 203104_at   | U133P | CSF1R   | 39,73861784 | 0,049790445 | 11,8705182 | 0,166012851 | 2,96006054 | 0           | 17,6833434 | 0          | 63,4458729 | 0,07828345 | 42,8863802 | 0,16096585 | 29,1165729 | 0          | 66,12459564  | 0           |
| 214974_x_at | U133P | CXCL5   | 64,89580444 | 0,049790445 | 84,8795918 | 0,166012851 | 21,1946662 | 0           | 85,5312586 | 0          | 121,92007  | 0,07828345 | 78,8006821 | 0,16096585 | 107,123732 | 0          | 51,35571943  | 0           |
| 215101_s_at | U133P | CXCL5   | 30,39462518 | 0,225862787 | 35,34375   | 0,166012851 | 61,1525327 | 0           | 25,9717186 | 0          | 62,1428571 | 0,07828345 | 33,3680124 | 0,16096585 | 40,6201143 | 0          | 94,69996328  | 0           |
| 209365_s_at | U133P | ECM1    | 3,450046685 | 0,049790445 | 3,31650398 | 0,166012851 | 8,78263575 | 0           | 6,93408398 | 0          | 4,87515255 | 0,07828345 | 6,13074498 | 0,16096585 | 5,21847677 | 0          | 0,003674049  | 0           |
| 209589_s_at | U133P | EPHB2   | 5,44704822  | 0,049790445 | 6,56723716 | 0,166012851 | 3,42194666 | 0           | 21,7196765 | 0          | 13,9636542 | 0,07828345 | 15,8997632 | 0,16096585 | 7,34833591 | 0          | 3,107697252  | 0           |
| 211165_x_at | U133P | EPHB2   | 18,33203008 | 0,049790445 | 12,2990315 | 0,166012851 | 11,8763152 | 0           | 48,3761905 | 0          | 29,1422834 | 0,07828345 | 49,3634597 | 0,16096585 | 16,660335  | 0          | 16,15531407  | 0           |
| 209588_at   | U133P | EPHB2   | 3,347042108 | 0,094925271 | 2,57439199 | 0,365048611 | 2,57414648 | 0,318779683 | 3,52958483 | 0          | 5,62109538 | 0,07828345 | 5,8558412  | 0,16096585 | 2,25166878 | 0          | 4,882390624  | 0           |
| 202305_s_at | U133P | FEZ2    | 7,665123344 | 0,049790445 | 3,94373056 | 0,166012851 | 2,3793565  | 0           | 2,96310851 | 0          | 6,64650456 | 0,07828345 | 3,68466282 | 0,16096585 | 6,65439195 | 0          | 2,488261776  | 0           |
| 214560_at   | U133P | FPRL2   | 11,26322807 | 0,049790445 | 9,63395253 | 0,166012851 | 12,2090823 | 0           | 17,4195726 | 0          | 14,2544183 | 0,07828345 | 22,1007564 | 0,16096585 | 11,0399138 | 0          | 45,03380589  | 0           |
| 230422_at   | U133P | FPRL2   | 71,04008609 | 0,049790445 | 43,1464052 | 0,166012851 | 37,8737808 | 0           | 404,745555 | 0          | 134,915185 | 0,07828345 | 193,249415 | 0,16096585 | 108,55457  | 0          | 316,1085395  | 0           |
| 219815_at   | U133P | GALST4  | 4,025334272 | 0,094925271 | 2,80713234 | 0,166012851 | 29,1836735 | 0           | 19,936827  | 0          | 2,19819635 | 0,22860673 | 4,48815191 | 0,16096585 | 4,89938514 | 0          | 0,351617051  | 0           |
| 205721_at   | U133P | GFRA2   | 18,84325075 | 0,049790445 | 3,63353871 | 0,542560453 | 6,82293763 | 0,318779683 | 41,2279635 | 0          | 59,4309885 | 0,07828345 | 31,9754833 | 0,16096585 | 17,0398639 | 0          | 35,01893287  | 0           |
| 205722_s_at | U133P | GFRA2   | 10,10690252 | 0,049790445 | 4,85643016 | 0,365048611 | 10,0770646 | 0           | 17,7780032 | 0          | 14,2547999 | 0,07828345 | 15,4134412 | 0,16096585 | 7,11247411 | 0          | 30,08387724  | 0           |
| 235139_at   | U133P | GNGT2   | 11,61461794 | 0,049790445 | 7,16393443 | 0,166012851 | 3,45481856 | 0           | 24,4817927 | 0          | 2,80451803 | 0,20150297 | 19,5700851 | 0,16096585 | 7,018793   | 0          | 35,50440081  | 0           |
| 223620_at   | U133P | GPR34   | 47,86964583 | 0,049790445 | 18,8586358 | 0,166012851 | 11,8674954 | 0           | 48,5908275 | 0          | 73,7229837 | 0,07828345 | 11,380821  | 0,16096585 | 44,8977928 | 0          | 140,889604   | 0           |
| 235458_at   | U133P | HAVCR2  | 122,3514004 | 0,049790445 | 14,9911124 | 0,166012851 | 2,67381586 | 0,132499772 | 523,835404 | 0          | 18,5833639 | 0,07828345 | 51,4514489 | 0,16096585 | 54,4915675 | 0          | 716,918536   | 0           |
| 218345_at   | U133P | HCA112  | 40,69901014 | 0,049790445 | 15,9105676 | 0,166012851 | 2,80532223 | 0           | 193,089054 | 0          | 195,308468 | 0,07828345 | 34,1495427 | 0,16096585 | 24,2816612 | 0          | 423,5353964  | 0           |
| 201765_s_at | U133P | HEXA    | 7,10676234  | 0,049790445 | 4,40173732 | 0,166012851 | 2,99919248 | 0           | 5,37826742 | 0          | 5,50217164 | 0,07828345 | 3,81746616 | 0,16096585 | 3,87417446 | 0          | 2,176291557  | 0,003674049 |
| 203665_at   | U133P | HMOX1   | 24,85218145 | 0,049790445 | 2,97401753 | 0,166012851 | 4,13952006 | 0           | 27,9837723 | 0          | 77,2214065 | 0,07828345 | 164,592396 | 0,16096585 | 22,1972642 | 0          | 6,139746636  | 0           |
| 219020_at   | U133P | HS1BP3  | 5,32604493  | 0,049790445 | 3,32180276 | 0,166012851 | 2,42432334 | 0           | 2,93819763 | 0          | 5,15059309 | 0,07828345 | 3,43001391 | 0,16096585 | 4,22006508 | 0          | 6,301857524  | 0           |
| 223113_at   | U133P | HSPC196 | 8,150009334 | 0,049790445 | 5,02160739 | 0,166012851 | 5,80126437 | 0           | 12,3495409 | 0          | 4,72492916 | 0,07828345 | 8,30360938 | 0,16096585 | 4,56617381 | 0          | 2,88583102   | 0           |
| 206638_at   | U133P | HTRB2   | 9,525791586 | 0,550622381 | 9,40969163 | 0,542560453 | 24,2948135 | 0,318779683 | 21,7959184 | 0,06059553 | 18,0771835 | 0,56723684 | 33,0241187 | 0,16096585 | 11,2844747 | 0          | 6,600601798  | 0,021157058 |
| 236281_x_at | U133P | HTR7    | 4,0231051   | 0,049790445 | 3,91607241 | 0,166012851 | 3,60119048 | 0           | 6,78999429 | 0          | 4,64415821 | 0,07828345 | 8,29152149 | 0,16096585 | 4,20921833 | 0          | 2,382379933  | 0           |
| 209541_at   | U133P | IGF1    | 45,81601061 | 0,049790445 | 4,06101519 | 0,166012851 | 11,962479  | 0           | 89,2340294 | 0          | 80,0788497 | 0,07828345 | 128,459821 | 0,16096585 | 2,54540425 | 0,00447705 | 9,45474791   | 0           |
| 209542_x_at | U133P | IGF1    | 32,70766653 | 0,049790445 | 7,31597886 | 0,166012851 | 91,6610313 | 0           | 41,4190222 | 0          | 57,6577455 | 0,07828345 | 89,3695055 | 0,16096585 | 2,69616639 | 0          | 22,60501477  | 0           |
| 211577_s_at | U133P | IGF1    | 21,68064302 | 0,049790445 | 4,26432623 | 0,166012851 | 20,4650835 | 0           | 25,0989985 | 0          | 19,7138336 | 0,07828345 | 41,3650161 | 0,16096585 | 2,41519648 | 0          | 17,36465903  | 0           |
| 207433_at   | U133P | IL10    | 20,07971689 | 0,049790445 | 24,8176796 | 0,166012851 | 5,19606709 | 0           | 21,5340364 | 0          | 14,7182176 | 0,07828345 | 46,1664954 | 0,16096585 | 22,0026226 | 0          | 50,91286895  | 0           |
| 222868_s_at | U133P | IL18BP  | 6,254571027 | 0,049790445 | 8,50984144 | 0,166012851 | 4,6948902  | 0,318779683 | 19,4361888 | 0          | 4,38473674 | 0,07828345 | 31,5838068 | 0,16096585 | 15,6246611 | 0          | 21,01358535  | 0           |
| 230966_at   | U133P | IL4I1   | 6,476002259 | 0,225862787 | 12,6171617 | 0,166012851 | 5,25137363 | 0           | 26,7717087 | 0          | 5,00130822 | 0,22860673 | 12,7306027 | 0,16096585 | 9,22649057 | 0          | 9,767085374  | 0           |
| 213446_s_at | U133P | IQGAP1  | 10,53488869 | 0,049790445 | 27,7625845 | 0,166012851 | 2,79600484 | 0,940698927 | 2,7021177  | 0,60581622 | 7,96207714 | 0,07828345 | 8,95784345 | 0,16096585 | 11,2499871 | 0          | 5,920490277  | 0           |
| 221583_s_at | U133P | KCNMA1  | 11,66259033 | 0,049790445 | 32,6806854 | 0,166012851 | 35,2621849 | 0           | 65,1583851 | 0          | 39,1290563 | 0,07828345 | 37,5599714 | 0,16096585 | 20,1479535 | 0          | 4,19151947   | 0           |
| 210644_s_at | U133P | LAIR1   | 14,86948026 | 0,049790445 | 14,9620634 | 0,166012851 | 3,13034178 | 0           | 2,77590136 | 0          | 6,41364813 | 0,07828345 | 2,47804732 | 0,16096585 | 19,957112  | 0          | 45,3968124   | 0           |
| 212858_at   | U133P | LHFPL2  | 10,85581562 | 0,049790445 | 23,3745304 | 0,166012851 | 11,2685874 | 0           | 28,5256983 | 0          | 55,9464632 | 0,07828345 | 11,8901106 | 0,16096585 | 28,742369  | 0          | 7,027208216  | 0           |
| 206856_at   | U133P | LILRB5  | 14,63336809 | 0,049790445 | 3,04227367 | 0,365048611 | 23,7983313 | 0           | 44,3141341 | 0          | 119,331633 | 0,07828345 | 130,518973 | 0,16096585 | 20,0218593 | 0          | 88,31592196  | 0           |
| 220532_s_at | U133P | LR8     | 62,05969648 | 0,049790445 | 28,1254759 | 0,166012851 | 2,93083422 | 0           | 207,109217 | 0          | 261,763039 | 0,07828345 | 58,8441443 | 0,16096585 | 25,5309307 | 0          | 293,1746032  | 0           |
| 235359_at   | U133P | LRRC33  | 3,530906213 | 0,225862787 | 6,90710636 | 0,166012851 | 3,60194739 | 0           | 75,872449  | 0          | 68,9749536 | 0,07828345 | 3,81131785 | 0,16096585 | 4,50361268 | 0          | 108,02217918 | 0           |
| 223655_at   | U133P | M160    | 42,12887975 | 0,049790445 | 20,6901878 | 0,166012851 | 62,8856775 | 0           | 47,1490683 | 0          | 71,2398332 | 0,07828345 | 43,6097281 | 0,16096585 | 20,4426939 | 0          | 59,15064935  | 0           |
| 210059_s_at | U133P | MAPK13  | 6,759292711 | 0,049790445 | 2,18144645 | 0,166012851 | 11,3239732 | 0           | 3,85376595 | 0          | 3,62787992 | 0,07828345 | 32,7410529 | 0,16096585 | 2,26249203 | 0          | 15,65412603  | 0           |
| 205819_at   | U133P | MARCO   | 406,6106312 | 0,049790445 | 104,285787 | 0,166012851 | 9,51928282 | 0           | 71,7744546 | 0          | 977,866731 | 0,07828345 | 1095,50483 | 0,16096585 | 368,609007 | 0          | 863,4201058  | 0           |
| 206028_s_at | U133P | MERTK   | 28,95365303 | 0,049790445 | 3,25449558 | 0,166012851 | 12,7900663 | 0           | 29,7935268 | 0          | 52,1613113 | 0,07828345 | 8,16610584 | 0,16096585 | 3,01982926 | 0          | 100,947479   | 0           |
| 211913_s_at | U133P | MERTK   | 8,799363057 | 0,049790445 |            |             |            |             |            |            |            |            |            |            |            |            |              |             |

|              |       |          |             |               |            |             |            |             |             |            |            |            |            |            |            |            |             |             |
|--------------|-------|----------|-------------|---------------|------------|-------------|------------|-------------|-------------|------------|------------|------------|------------|------------|------------|------------|-------------|-------------|
| 239519_at    | U133P | NRP1     | 13,19834568 | 0,049790445   | 9,37913299 | 0,166012851 | 20,7696062 | 0           | 29,4124424  | 0          | 16,3402458 | 0,07828345 | 24,9804305 | 0,16096585 | 18,1343334 | 0          | 13,68533905 | 0           |
| 242677_at    | U133P | NRP1     | 14,23369565 | 0,049790445   | 4,05238727 | 0,166012851 | 30,7394366 | 0           | 30,9574468  | 0          | 17,6008065 | 0,07828345 | 17,6008065 | 0,16096585 | 35,7786885 | 0,16096585 | 6,52297464  | 0           |
| 222877_at    | U133P | NRP2     | 33,64231738 | 0,049790445   | 11,2708861 | 0,166012851 | 27,7210461 | 0           | 43,8188976  | 0          | 47,6659529 | 0,07828345 | 50,4761905 | 0,16096585 | 31,8537465 | 0          | 3,474053843 | 0           |
| 225566_at    | U133P | NRP2     | 68,27631103 | 0,049790445   | 44,0055944 | 0,166012851 | 98,5714286 | 0           | 110,168067  | 0          | 91,358885  | 0,07828345 | 117,666417 | 0,16096585 | 35,4431179 | 0          | 2,715515567 | 0           |
| 229225_at    | U133P | NRP2     | 5,576009161 | 0,094925271   | 10,1976009 | 0,166012851 | 17,433763  | 0           | 11,9622896  | 0          | 34,35097   | 0,07828345 | 35,3998546 | 0,16096585 | 12,4132655 | 0          | 3,392171376 | 0           |
| 214632_at    | U133P | NRP2     | 3,589749632 | 0,225862787   | 6,32772586 | 0,166012851 | 10,7470899 | 0           | 10,5287166  | 0          | 14,625576  | 0,07828345 | 14,2520348 | 0,16096585 | 7,40917838 | 0          | 3,732108406 | 0           |
| 213125_at    | U133P | OLFML2B  | 22,86356017 | 0,049790445   | 18,0387667 | 0,166012851 | 34,3413897 | 0           | 36,7388494  | 0          | 44,0240124 | 0,07828345 | 35,4996877 | 0,16096585 | 27,5392789 | 0          | 4,730173042 | 0           |
| 155342_s_at  | U133P | OTOA     | 8,301415954 | 0,049790445   | 2,7635164  | 0,365048611 | 16,0942596 | 0           | 10,8617654  | 0          | 27,973356  | 0,07828345 | 41,960034  | 0,16096585 | 9,18308838 | 0          | 25,59498595 | 0           |
| 207455_at    | U133P | P2RY1    | 8,772022435 | 0,049790445   | 6,68712274 | 0,166012851 | 4,77171572 | 0,318779683 | 8,61680062  | 0          | 15,3404108 | 0,07828345 | 4,01001448 | 0,5514082  | 13,543977  | 0          | 14,82740032 | 0           |
| 218589_at    | U133P | P2RY5    | 35,82449274 | 0,049790445   | 13,6416049 | 0,166012851 | 2,03145478 | 0           | 45,9313842  | 0          | 2,13005185 | 0,07828345 | 5,01722317 | 0,16096585 | 7,87146177 | 0          | 11,13843789 | 0           |
| 208373_s_at  | U133P | P2RY6    | 29,30337375 | 0,049790445   | 13,6850074 | 0,166012851 | 18,6151296 | 0           | 37,2302592  | 0          | 47,9541925 | 0,07828345 | 88,8279003 | 0,16096585 | 6,31059602 | 0          | 9,008751317 | 0           |
| 207414_s_at  | U133P | PCSK6    | 40,31589537 | 0,049790445   | 34,0765306 | 0,166012851 | 53,3040702 | 0           | 36,8394926  | 0          | 61,9573284 | 0,07828345 | 61,9573284 | 0,16096585 | 29,3262688 | 0          | 40,38699924 | 0           |
| 209785_s_at  | U133P | PLA2G4C  | 5,83095445  | 0,049790445   | 3,06457926 | 0,278829014 | 7,05278328 | 0           | 19,1099902  | 0          | 12,0970234 | 0,07828345 | 7,48709122 | 0,16096585 | 4,57373136 | 0          | 3,912608961 | 0           |
| 226636_at    | U133P | PLD1     | 24,26001195 | 0,049790445   | 10,1875    | 0,166012851 | 7,99964522 | 0           | 2,29593049  | 0          | 48,5606604 | 0,07828345 | 2,86158467 | 0,16096585 | 27,0801759 | 0          | 4,349694566 | 0           |
| 206471_s_at  | U133P | PLXNC1   | 5,136452019 | 0,415272173   | 11,3864097 | 0,166012851 | 5,20057439 | 0,318779683 | 2,94069883  | 0,29183491 | 14,5540576 | 0,07828345 | 12,4330011 | 0,16096585 | 7,10798099 | 0          | 35,80704319 | 0           |
| 38671_at     | U133P | PLXND1   | 18,17979371 | 0,049790445   | 11,574768  | 0,166012851 | 3,07367161 | 0           | 28,5295515  | 0          | 7,06919137 | 0,07828345 | 2,59144055 | 0,16096585 | 23,8861971 | 0          | 2,609542524 | 0           |
| 1555781_at   | U133P | PLQC2    | 3,652777031 | 0,049790445   | 3,65966387 | 0,166012851 | 3,86793742 | 0           | 3,6762987   | 0          | 4,02380952 | 0,07828345 | 4,80276552 | 0,16096585 | 4,06771026 | 0          | 4,07705464  | 0           |
| 204044_at    | U133P | QPRT     | 41,77416595 | 0,049790445   | 2,93800199 | 0,278829014 | 24,3118512 | 0           | 34,9425781  | 0          | 110,998977 | 0,07828345 | 9,41850373 | 0,16096585 | 2,89716178 | 0          | 22,78435832 | 0           |
| 211503_s_at  | U133P | RAB14    | 2,640278232 | 0,049790445   | 3,51145659 | 0,166012851 | 2,91956585 | 0           | 2,36257751  | 0          | 2,57354418 | 0,07828345 | 2,16669397 | 0,16096585 | 3,29365789 | 0          | 2,301537137 | 0           |
| 209568_s_at  | U133P | RLG1     | 56,64593489 | 0,049790445   | 12,6147666 | 0,166012851 | 22,8017152 | 0           | 68,2002026  | 0          | 38,7265748 | 0,07828345 | 76,7941074 | 0,16096585 | 22,8272104 | 0          | 6,784804408 | 0           |
| 205823_at    | U133P | RGS12    | 4,789285714 | 0,094925271   | 6,85162477 | 0,166012851 | 3,57622888 | 0,132499772 | 9,69883701  | 0          | 4,76261507 | 0,07828345 | 2,55020539 | 0,61390985 | 5,07633972 | 0          | 3,162283355 | 0,003674049 |
| 209684_at    | U133P | RIN2     | 102,8368777 | 0,049790445   | 38,2931805 | 0,166012851 | 2,38402057 | 0           | 112,873987  | 0          | 189,663621 | 0,07828345 | 24,4299622 | 0,16096585 | 105,837582 | 0          | 3,633766957 | 0           |
| 209686_at    | U133P | S100B    | 31,97095501 | 0,049790445   | 90,016     | 0,166012851 | 129,631336 | 0           | 147,020906  | 0          | 12,2206936 | 0,20150297 | 59,6817539 | 0,16096585 | 97,1494743 | 0          | 97,90300096 | 0           |
| 201646_at    | U133P | SCARB2   | 16,34780109 | 0,049790445   | 6,99299152 | 0,166012851 | 6,16547059 | 0           | 17,2429057  | 0          | 19,2897843 | 0,07828345 | 6,147743   | 0,16096585 | 4,58996765 | 0          | 3,512565685 | 0,003674049 |
| 205508_at    | U133P | SCN1B    | 3,958859932 | 0,049790445   | 2,51745926 | 0,278829014 | 11,9362977 | 0           | 6,40277425  | 0          | 11,7546584 | 0,07828345 | 8,58958357 | 0,16096585 | 4,39387119 | 0          | 6,932234432 | 0           |
| 202898_at    | U133P | SDC3     | 28,59358601 | 0,049790445   | 2,63815365 | 0,278829014 | 26,2375602 | 0           | 57,5158339  | 0          | 45,4307949 | 0,07828345 | 67,8820598 | 0,16096585 | 8,00267534 | 0          | 2,321023299 | 0,003674049 |
| 231669_at    | U133P | SEPP1    | 5,317641575 | 0,049790445   | 10,6825843 | 0,166012851 | 38,8061224 | 0           | 26,1195055  | 0          | 17,7544351 | 0,07828345 | 15,3470541 | 0,16096585 | 7,50215132 | 0          | 23,2671275  | 0           |
| 229620_at    | U133P | SEPP1    | 9,667774086 | 0,049790445   | 5,52531646 | 0,166012851 | 31,653372  | 0           | 17,7655678  | 0          | 23,0952381 | 0,07828345 | 3,98448197 | 0,16096585 | 5,33505601 | 0          | 44,54081633 | 0           |
| 1552910_at   | U133P | SIGLEC11 | 9,911669781 | 0,094925271   | 2,39060964 | 0,755571738 | 2,99544138 | 0,593812245 | 21,2429008  | 0          | 17,3227645 | 0,07828345 | 8,65059598 | 0,16096585 | 7,57152666 | 0          | 6,657918759 | 0           |
| 210569_s_at  | U133P | SIGLEC9  | 28,15114578 | 0,049790445   | 9,68108652 | 0,166012851 | 2,64775479 | 0           | 10,2285289  | 0          | 42,6929902 | 0,07828345 | 77,2311396 | 0,16096585 | 12,185142  | 0          | 37,15444015 | 0           |
| 219385_at    | U133P | SLAMF8   | 54,61526088 | 0,049790445   | 44,6905232 | 0,166012851 | 67,5794895 | 0           | 35,0344374  | 0          | 53,5377247 | 0,07828345 | 89,0820543 | 0,16096585 | 42,5480410 | 0          | 161,6839286 | 0           |
| 219386_s_at  | U133P | SLAMF8   | 133,6537071 | 0,049790445   | 36,3732776 | 0,166012851 | 38,8042736 | 0           | 52,6615604  | 0          | 57,0429112 | 0,07828345 | 567,668971 | 0,16096585 | 113,117183 | 0          | 529,0342976 | 0           |
| 202800_at    | U133P | SLC1A3   | 207,081761  | 0,049790445   | 26,8501864 | 0,166012851 | 58,9648997 | 0           | 112,145777  | 0          | 337,356557 | 0,07828345 | 160,145914 | 0,16096585 | 107,940165 | 0          | 7,498519699 | 0           |
| 1561615_s_at | U133P | SLC8A1   | 16,25074627 | 0,094925271   | 15,7471074 | 0,278829014 | 3,34644701 | 0,940698927 | 9,17734322  | 0,16036085 | 40,3857567 | 0,07828345 | 57,1848739 | 0,16096585 | 9,3186511  | 0          | 14,33260202 | 0           |
| 215820_x_at  | U133P | SNX13    | 2,585287324 | 0,225862787   | 5,62705667 | 0,166012851 | 2,47169357 | 0,318779683 | 2,49412527  | 0,06059553 | 4,82672103 | 0,07828345 | 5,83175445 | 0,16096585 | 4,07543983 | 0          | 4,184434123 | 0           |
| 218705_s_at  | U133P | SNX24    | 14,65839518 | 0,049790445   | 2,48104098 | 0,278829014 | 5,25097199 | 0           | 49,1806723  | 0          | 5,2601488  | 0,07828345 | 39,7078779 | 0,16096585 | 3,11729331 | 0          | 2,61140089  | 0           |
| 222716_s_at  | U133P | SNX24    | 23,23516484 | 0,049790445   | 2,38850481 | 0,166012851 | 10,6930453 | 0           | 36,5863787  | 0          | 8,26376513 | 0,07828345 | 21,404276  | 0,16096585 | 4,20517157 | 0          | 2,811926483 | 0           |
| 223241_at    | U133P | SNX8     | 2,436671576 | 0,049790445   | 11,8504132 | 0,166012851 | 4,64707026 | 0           | 22,2897559  | 0          | 10,9016954 | 0,07828345 | 12,6057143 | 0,16096585 | 8,45673884 | 0          | 7,554131179 | 0           |
| 228231_at    | U133P | SNX8     | 4,568941937 | 0,049790445   | 12,5763176 | 0,166012851 | 18,075285  | 0           | 32,010453   | 0          | 13,7571129 | 0,07828345 | 7,59507275 | 0,16096585 | 14,2314232 | 0          | 5,186610524 | 0           |
| 223173_at    | U133P | SPIN1    | 7,787638669 | 0,049790445   | 7,75778078 | 0,166012851 | 2,28813559 | 0,593812245 | 17,15909091 | 0          | 4,83090838 | 0,07828345 | 5,7703147  | 0,16096585 | 6,08874406 | 0          | 4,742098914 | 0           |
| 1568574_x_at | U133P | SPP1     | 7,001381597 | 0,049790445   | 4,15240905 | 0,166012851 | 4,54966602 | 0           | 6,04494704  | 0          | 11,3827493 | 0,07828345 | 7,147935   | 0,16096585 | 6,41739557 | 0          | 7,283127335 | 0           |
| 209875_s_at  | U133P | SPP1     | 155,3910903 | 0,049790445   | 183,224719 | 0,166012851 | 256,278485 | 0           | 53,4182855  | 0          | 199,620517 | 0,07828345 | 75,1474654 | 0,16096585 | 23,791591  | 0          | 103,2115826 | 0           |
| 226837_at    | U133P | SPRED1   | 94,95324675 | 0,049790445   | 15,7505386 | 0,166012851 | 11,1210148 | 0           | 67,1263313  | 0          | 57,5157332 | 0,07828345 | 20,8730159 | 0,16096585 | 13,8254524 | 0          | 2,893045095 | 0,003674049 |
| 233039_at    | U133P | SPRED1   | 8,547545334 | 0,049790445   | 6,23017408 | 0,166012851 | 10,60237   | 0           | 17,5627045  | 0          | 13,0722403 | 0,07828345 | 6,70762182 | 0,16096585 | 9,78044232 | 0          | 12,72284398 | 0           |
| 233465_at    | U133P | SPRED1   | 7,449031787 | 0,049790445   | 5,01179941 | 0,166012851 | 8,28376402 | 0           | 19,1113611  | 0          | 6,42101285 | 0,07828345 | 8,63751906 | 0,16096585 | 6,39649601 | 0          | 11,0955102  | 0           |
| 235074_at    | U133P | SPRED1   | 66,62914863 | 0,049790445   | 16,8272595 | 0,166012851 | 14,9643505 | 0           | 214,165121  | 0          | 45,680649  | 0,07828345 | 11,6459847 | 0,16096585 | 10,5152418 | 0          | 2,750744668 | 0           |
| 244439_at    | U133P | SPRED1   | 15,20338983 | 0,049790445   | 3,64316797 | 0,365048611 | 17,283327  | 0           | 29,0291262  | 0          | 27,9439252 | 0,07828345 | 26         | 0,16096585 | 6,76699635 | 0          | 12,08080808 | 0           |
| 213112_s_at  | U133P | SQSTM1   | 31,87563025 | 0,049790445   | 17,0174966 | 0,166012851 | 20,2045382 | 0           | 37,3199528  | 0          | 44,1634649 | 0,07828345 | 38,4316169 | 0,16096585 | 9,30735123 | 0          | 2,89082803  | 0,021157058 |
| 1555319_at   | U133P | STAB1    | 8,323117761 | 0,049790445   | 5,82421479 | 0,166012851 | 5,28451921 | 0           | 8,05883803  | 0          | 13,9425176 | 0,07828345 | 8,98483901 | 0,16096585 | 9,47913786 | 0          | 15,11437336 | 0           |
| 1555320_a_at | U133P | STAB1    | 4,488416988 | 0,049790445   | 4,55212922 | 0,166012851 | 6,2286518  | 0           | 7,07439525  | 0          | 7,70856646 | 0,07828345 | 10,122449  | 0,16096585 | 6,13636541 | 0          | 15,71000235 | 0           |
| 204150_at    | U133P | STAB1    | 270,4745091 | 0,049790445</ |            |             |            |             |             |            |            |            |            |            |            |            |             |             |

|             |       |          |             |             |            |             |            |             |             |            |            |            |            |            |            |             |             |             |
|-------------|-------|----------|-------------|-------------|------------|-------------|------------|-------------|-------------|------------|------------|------------|------------|------------|------------|-------------|-------------|-------------|
| 208161_s_at | U133P | ABCC3    | 76.38790036 | 0,049790445 | 10,8315311 | 0,166012851 | 8,02489906 | 0           | 128,225806  | 0          | 130,090909 | 0,07828345 | 143,1      | 0,16096585 | 37,4653665 | 0           | 5,21786691  | 0           |
| 230682_x_at | U133P | ABCC3    | 14,85714286 | 0,049790445 | 9,19391635 | 0,166012851 | 8,32358003 | 0           | 9,00726392  | 0          | 18,6718147 | 0,07828345 | 16,3323202 | 0,16096585 | 5,01007036 | 0           | 7,03162484  | 0           |
| 239217_x_at | U133P | ABCC3    | 5,494152047 | 0,049790445 | 4,64606146 | 0,166012851 | 2,75271023 | 0           | 10,8237327  | 0          | 8,41845878 | 0,07828345 | 6,76385889 | 0,16096585 | 5,88360189 | 0           | 2,89002198  | 0           |
| 200727_s_at | U133P | ACTR2    | 2,023358889 | 0,71232465  | 12,715826  | 0,166012851 | 2,96505813 | 0,940698927 | 2,43891174  | 0,60581622 | 6,38376317 | 0,20150297 | 6,22085595 | 0,31723588 | 6,68239135 | 0           | 4,513048377 | 0           |
| 202120_x_at | U133P | AP2S1    | 4,6654133   | 0,049790445 | 3,27816204 | 0,166012851 | 2,30466553 | 0           | 4,98164856  | 0          | 6,75904227 | 0,07828345 | 5,49958603 | 0,16096585 | 4,79096928 | 0           | 2,253628885 | 0           |
| 200760_s_at | U133P | ARLBP5   | 4,042868522 | 0,049790445 | 5,63978208 | 0,166012851 | 2,11501094 | 0,132499772 | 2,80605748  | 0          | 2,41565058 | 0,07828345 | 2,02729944 | 0,16096585 | 5,21852808 | 0           | 2,400064852 | 0           |
| 218608_at   | U133P | ATP13A2  | 6,381667689 | 0,049790445 | 3,47819549 | 0,166012851 | 3,35120255 | 0           | 3,69331486  | 0,06059553 | 2,02303207 | 0,854441   | 2,21466871 | 0,61390985 | 3,17071617 | 0           | 0,038306231 | 0           |
| 212383_at   | U133P | ATP6VOA1 | 4,964708756 | 0,049790445 | 2,56930827 | 0,166012851 | 3,16931712 | 0           | 3,1136844   | 0          | 6,17909903 | 0,07828345 | 3,87377087 | 0,16096585 | 2,50672011 | 0           | 4,729641694 | 0           |
| 214934_at   | U133P | ATP9B    | 7,18595015  | 0,049790445 | 4,09644596 | 0,166012851 | 3,13912559 | 0           | 5,3274164   | 0          | 3,24174939 | 0,07828345 | 3,00218387 | 0,16096585 | 3,88852878 | 0           | 4,927445852 | 0           |
| 201733_at   | U133P | CLCN3    | 4,735569456 | 0,049790445 | 3,8957729  | 0,166012851 | 4,08060945 | 0           | 8,13403132  | 0          | 4,511013   | 0,07828345 | 6,17438424 | 0,16096585 | 2,59748142 | 0           | 3,43350226  | 0           |
| 232127_at   | U133P | CLCN5    | 3,725897457 | 0,049790445 | 5,14847458 | 0,166012851 | 2,34817563 | 0,132499772 | 8,43590313  | 0          | 6,09470305 | 0,07828345 | 6,43450263 | 0,16096585 | 5,16463085 | 0           | 6,329296268 | 0           |
| 204050_s_at | U133P | CLTA     | 8,729994258 | 0,049790445 | 3,67442235 | 0,166012851 | 2,53174085 | 0           | 4,34945642  | 0          | 5,915425   | 0,07828345 | 2,4781248  | 0,16096585 | 3,61348632 | 0           | 2,260856059 | 0           |
| 229168_at   | U133P | COL23A1  | 12,06598482 | 0,049790445 | 5,18604651 | 0,166012851 | 13,3008438 | 0           | 6,6167318   | 0          | 12,0715606 | 0,07828345 | 10,7767562 | 0,16096585 | 6,55587957 | 0           | 42,41871255 | 0           |
| 201279_s_at | U133P | DAB2     | 160,9058403 | 0,049790445 | 13,8024713 | 0,166012851 | 98,3391608 | 0           | 625         | 0          | 579,896907 | 0,07828345 | 24,0384615 | 0,16096585 | 32,3609019 | 0           | 2,94965915  | 0           |
| 210757_x_at | U133P | DAB2     | 86,19648177 | 0,049790445 | 13,4824258 | 0,166012851 | 62,1686414 | 0           | 442,40498   | 0          | 308,457204 | 0,07828345 | 23,6925039 | 0,16096585 | 31,6892526 | 0           | 2,242297081 | 0           |
| 232898_at   | U133P | DAB2     | 2,696446849 | 0,049790445 | 16,2629521 | 0,166012851 | 10,7738635 | 0           | 14,6529857  | 0          | 10,6674788 | 0,07828345 | 9,53737675 | 0,16096585 | 10,9745024 | 0           | 5,452221646 | 0           |
| 240873_x_at | U133P | DAB2     | 103,1371429 | 0,049790445 | 22,7126678 | 0,166012851 | 81,2530012 | 0           | 47,1619956  | 0          | 246,346679 | 0,07828345 | 15,108418  | 0,16096585 | 40,4643521 | 0           | 10,63756917 | 0           |
| 204829_s_at | U133P | FOLR2    | 18,04572517 | 0,049790445 | 4,61297224 | 0,166012851 | 8,03678249 | 0           | 146,1249087 | 0          | 38,200242  | 0,07828345 | 85,6784261 | 0,16096585 | 20,7671612 | 0           | 160,0295671 | 0           |
| 206087_x_at | U133P | HFE      | 5,142292614 | 0,049790445 | 2,35516677 | 0,166012851 | 2,71327297 | 0           | 11,8802713  | 0          | 5,8739951  | 0,07828345 | 15,6655584 | 0,16096585 | 5,01730344 | 0           | 2,693398822 | 0           |
| 211330_s_at | U133P | HFE      | 8,309601491 | 0,049790445 | 6,56838906 | 0,166012851 | 4,12619337 | 0           | 13,6379805  | 0          | 10,2904762 | 0,07828345 | 18,7409335 | 0,16096585 | 10,9582747 | 0           | 3,726592201 | 0           |
| 214647_s_at | U133P | HFE      | 5,650184502 | 0,049790445 | 4,46153846 | 0,166012851 | 4,39393939 | 0           | 11,3523132  | 0          | 10,1430843 | 0,07828345 | 20,3833866 | 0,16096585 | 6,88586726 | 0           | 2,784506274 | 0,003674049 |
| 235754_at   | U133P | HFE      | 9,697777051 | 0,049790445 | 7,80157791 | 0,166012851 | 5,1612819  | 0           | 10,8664835  | 0          | 12,8189007 | 0,07828345 | 14,6997176 | 0,16096585 | 7,72401269 | 0           | 5,827496658 | 0           |
| 226918_at   | U133P | JPH4     | 2,696446849 | 0,049790445 | 2,25862787 | 0,166012851 | 2,16504649 | 0,318779683 | 5,79249906  | 0          | 2,84741523 | 0,20150297 | 2,24934133 | 0,5514082  | 2,67232509 | 0           | 9,562354161 | 0           |
| 200900_s_at | U133P | M6PR     | 16,03904267 | 0,049790445 | 13,001899  | 0,166012851 | 4,69119561 | 0           | 19,0294608  | 0          | 5,66989905 | 0,07828345 | 7,77329958 | 0,16096585 | 6,37767434 | 0           | 7,55203412  | 0           |
| 219952_s_at | U133P | MCOLN1   | 17,0016     | 0,049790445 | 3,45392491 | 0,166012851 | 4,20016601 | 0           | 5,82469988  | 0          | 12,2858134 | 0,07828345 | 11,7362492 | 0,16096585 | 6,83165896 | 0           | 11,58147139 | 0           |
| 214770_at   | U133P | MSR1     | 115,7056495 | 0,049790445 | 10,028256  | 0,166012851 | 14,6832703 | 0           | 83,945802   | 0          | 133,843656 | 0,07828345 | 327,173382 | 0,16096585 | 41,1814425 | 0           | 83,82325339 | 0           |
| 211887_x_at | U133P | MSR1     | 4,56691135  | 0,094925271 | 4,34138486 | 0,166012851 | 7,59650606 | 0           | 17,2709801  | 0          | 18,1598063 | 0,07828345 | 14,9861034 | 0,16096585 | 8,99552053 | 0           | 7,013223499 | 0           |
| 208423_s_at | U133P | MSR1     | 4,357991177 | 0,225862787 | 3,60657119 | 0,441369819 | 6,37053571 | 0           | 8,78694581  | 0          | 13,4116541 | 0,07828345 | 5,78044829 | 0,16096585 | 4,67888985 | 0           | 13,27098941 | 0           |
| 208189_s_at | U133P | MYO7A    | 11,87246663 | 0,049790445 | 9,83538084 | 0,166012851 | 14,8405833 | 0           | 13,7907671  | 0          | 24,5081633 | 0,07828345 | 42,6759062 | 0,16096585 | 10,6437504 | 0           | 42,8001188  | 0           |
| 33197_at    | U133P | MYO7A    | 7,373282569 | 0,049790445 | 7,9087358  | 0,166012851 | 4,52570616 | 0           | 10,5629862  | 0          | 9,13195014 | 0,07828345 | 10,3566778 | 0,16096585 | 7,92942229 | 0           | 16,31575092 | 0           |
| 202075_s_at | U133P | PLTP     | 196,4706873 | 0,049790445 | 11,536293  | 0,441369819 | 331,358677 | 0           | 97,0225616  | 0          | 487,155388 | 0,07828345 | 27,4766051 | 0,16096585 | 37,8239702 | 0           | 72,86657746 | 0           |
| 224921_at   | U133P | SCAMP2   | 7,181737114 | 0,049790445 | 3,1059005  | 0,166012851 | 2,83741315 | 0           | 3,37156923  | 0          | 3,62389532 | 0,07828345 | 5,75717717 | 0,16096585 | 3,30871076 | 0           | 6,937774587 | 0           |
| 216392_s_at | U133P | SEC23IP  | 5,300742647 | 0,225862787 | 5,80407222 | 0,166012851 | 5,23093969 | 0,318779683 | 6,94429123  | 0,06059553 | 5,31074241 | 0,20150297 | 3,7785114  | 0,5514082  | 2,85978993 | 0,011939093 | 3,129084037 | 0,030862012 |
| 203123_s_at | U133P | SLC11A2  | 8,25794433  | 0,049790445 | 13,5302385 | 0,166012851 | 8,06975208 | 0           | 18,2780047  | 0          | 7,71185824 | 0,07828345 | 7,94960338 | 0,16096585 | 9,69978171 | 0           | 10,82403714 | 0           |
| 203124_s_at | U133P | SLC11A2  | 6,607659759 | 0,049790445 | 8,81233167 | 0,166012851 | 4,88232912 | 0           | 27,4372567  | 0          | 3,64110044 | 0,07828345 | 4,11041816 | 0,16096585 | 6,27516422 | 0           | 5,338415893 | 0           |
| 203125_x_at | U133P | SLC11A2  | 7,208198052 | 0,049790445 | 3,58590753 | 0,166012851 | 4,69693764 | 0           | 15,1751537  | 0          | 2,90773059 | 0,07828345 | 4,45606905 | 0,16096585 | 3,99552903 | 0           | 2,824174805 | 0           |
| 219915_s_at | U133P | SLC16A10 | 4,482801363 | 0,049790445 | 3,89971694 | 0,166012851 | 8,51492142 | 0           | 19,10819153 | 0          | 3,93857715 | 0,07828345 | 6,94412442 | 0,16096585 | 5,34389207 | 0           | 28,06888188 | 0           |
| 222939_s_at | U133P | SLC16A10 | 61,84020619 | 0,049790445 | 20,8591654 | 0,166012851 | 11,1021655 | 0,132499772 | 98,4975369  | 0          | 76,9038462 | 0,07828345 | 79,0316206 | 0,16096585 | 17,3958897 | 0           | 183,862069  | 0           |
| 221041_s_at | U133P | SLC17A5  | 5,87630662  | 0,049790445 | 3,35362351 | 0,166012851 | 8,92328042 | 0           | 8,56719535  | 0          | 9,59025716 | 0,07828345 | 8,12727565 | 0,16096585 | 3,1238134  | 0           | 3,358106177 | 0           |
| 204981_at   | U133P | SLC22A18 | 9,09289454  | 0,049790445 | 4,08936789 | 0,166012851 | 2,49256978 | 0,132499772 | 2,97501586  | 0,06059553 | 5,33502549 | 0,07828345 | 8,20084834 | 0,16096585 | 3,47326693 | 0           | 7,070852769 | 0           |
| 211572_s_at | U133P | SLC23A2  | 3,172633227 | 0,415272173 | 7,535645   | 0,166012851 | 7,95907391 | 0           | 9,94973426  | 0          | 7,22116368 | 0,07828345 | 10,8919809 | 0,16096585 | 8,18597749 | 0           | 15,23880353 | 0           |
| 209003_at   | U133P | SLC25A11 | 11,62315271 | 0,049790445 | 3,01359037 | 0,166012851 | 2,26555045 | 0,318779683 | 2,75849975  | 0,06059553 | 4,30951525 | 0,07828345 | 2,83640626 | 0,16096585 | 2,61803552 | 0           | 2,919453453 | 0           |
| 1552695_a_a | U133P | SLC2A13  | 4,181046676 | 0,049790445 | 3,76656473 | 0,166012851 | 2,14925547 | 0           | 6,07430544  | 0          | 3,6835809  | 0,07828345 | 6,04647357 | 0,16096585 | 2,50622865 | 0           | 2,715663757 | 0           |
| 213119_at   | U133P | SLC36A1  | 14,13943222 | 0,049790445 | 48,4048984 | 0,166012851 | 6,40870141 | 0           | 4,95070032  | 0          | 15,8049752 | 0,07828345 | 15,7599253 | 0,16096585 | 24,1657612 | 0           | 6,18161047  | 0           |
| 238638_at   | U133P | SLC37A2  | 9,387728089 | 0,049790445 | 2,68478261 | 0,166012851 | 3,9141438  | 0           | 10,9451058  | 0          | 12,1863034 | 0,07828345 | 9,91670662 | 0,16096585 | 5,21314968 | 0           | 23,62174378 | 0           |
| 214830_at   | U133P | SLC38A6  | 66,56298466 | 0,049790445 | 10,5892754 | 0,166012851 | 11,3568606 | 0           | 85,392625   | 0          | 19,8121192 | 0,07828345 | 12,6416298 | 0,16096585 | 18,2958973 | 0           | 7,427494604 | 0           |
| 198699_s_at | U133P | SLC39A8  | 22,26028708 | 0,049790445 | 8,77574778 | 0,166012851 | 14,7246487 | 0           | 28,2786287  | 0          | 11,1088825 | 0,07828345 | 3,79911808 | 0,31723588 | 2,75870396 | 0,03210879  | 40,66783217 | 0           |
| 207528_s_at | U133P | SLC7A11  | 3,132367254 | 0,550622381 | 2,52352326 | 0,542560453 | 7,16884467 | 0           | 4,1720681   | 0          | 4,61608338 | 0,07828345 | 9,85204082 | 0,16096585 | 2,31344311 | 0,12150651  | 2,540510909 | 0,038306231 |
| 227791_at   | U133P | SLC9A9   | 16,62595176 | 0,049790445 | 5,30607667 | 0,166012851 | 3,26938058 | 0           | 10,013199   | 0          | 5,14503213 | 0,07828345 | 10,4418138 | 0,16096585 | 8,12822241 | 0           | 13,81462638 | 0           |
| 242587_at   | U133P | SLC9A9   | 7,111943794 | 0,049790445 | 4,44756883 | 0,166012851 | 5,16954923 | 0           | 7,07944797  | 0          | 5,5448437  | 0,07828345 | 13,1304047 | 0,16096585 | 5,19285849 | 0           | 15,08094686 | 0           |

|                                         |       |          |             |             |            |             |            |             |            |            |            |            |             |            |            |            |             |             |
|-----------------------------------------|-------|----------|-------------|-------------|------------|-------------|------------|-------------|------------|------------|------------|------------|-------------|------------|------------|------------|-------------|-------------|
| 206392_s_at                             | U133P | RARRS1   | 25.68380952 | 0,049790445 | 36,6413043 | 0,166012851 | 22,1922317 | 0           | 70,8193277 | 0          | 39,4730679 | 0,07828345 | 7,3634775   | 0,16096585 | 29,2000818 | 0          | 4,12480881  | 0           |
| 212872_at                               | U133P | RARRS1   | 38,0135468  | 0,049790445 | 10,0675147 | 0,166012851 | 44,2728055 | 0           | 65,6186224 | 0          | 56,1014177 | 0,07828345 | 5,03375734  | 0,5514082  | 20,4459865 | 0          | 2,31503949  | 0,178283666 |
| 1558924_s_at                            | U133P | RSN      | 3,352363    | 0,71232465  | 27,8501119 | 0,166012851 | 4,07709439 | 0,593812245 | 3,13877263 | 0,60581622 | 4,94007937 | 0,22860673 | 5,91626271  | 0,5514082  | 5,81470094 | 0          | 2,663979885 | 0,030862012 |
| 41644_at                                | U133P | SASH1    | 3,794871795 | 0,049790445 | 3,24465733 | 0,166012851 | 3,30227064 | 0           | 13,0430275 | 0          | 9,54114524 | 0,07828345 | 13,7111717  | 0,16096585 | 6,01228679 | 0          | 2,079696918 | 0,003674049 |
| <b>Signal transduction</b>              |       |          |             |             |            |             |            |             |            |            |            |            |             |            |            |            |             |             |
| 208212_s_at                             | U133P | ALK      | 29,99515738 | 0,225862787 | 83,2806723 | 0,166012851 | 67,6754985 | 0           | 61,5017997 | 0          | 76,1167435 | 0,07828345 | 99,9838579  | 0,16096585 | 61,7137365 | 0          | 120,7480963 | 0           |
| 214869_x_at                             | U133P | GAPVD1   | 2,445613893 | 0,225862787 | 3,51939881 | 0,166012851 | 2,66026759 | 0           | 3,52815446 | 0          | 3,52815446 | 0,07828345 | 3,92263041  | 0,16096585 | 2,82168978 | 0          | 4,150069124 | 0           |
| 1553316_at                              | U133P | GPR82    | 5,628084069 | 0,049790445 | 6,65837838 | 0,166012851 | 9,32052058 | 0           | 7,33214286 | 0          | 8,1619401  | 0,07828345 | 9,97570457  | 0,16096585 | 4,72981406 | 0          | 8,769340294 | 0           |
| 1553317_s_at                            | U133P | GPR82    | 8,514094601 | 0,049790445 | 18,7974684 | 0,166012851 | 22,3308271 | 0           | 11,7205988 | 0          | 31,4285714 | 0,07828345 | 48,2142857  | 0,16096585 | 18,8406593 | 0          | 23,73626374 | 0           |
| 230631_s_at                             | U133P | IFNAR2   | 93,6031746  | 0,049790445 | 4,61604697 | 0,166012851 | 3,78024937 | 0           | 3,68274785 | 0          | 81,7891817 | 0,07828345 | 32,092517   | 0,16096585 | 11,1498545 | 0          | 92,11064107 | 0           |
| 230632_at                               | U133P | IFNAR2   | 14,9020936  | 0,049790445 | 3,69030192 | 0,166012851 | 2,18180343 | 0           | 3,47745495 | 0          | 21,5810594 | 0,07828345 | 26,0730446  | 0,16096585 | 4,33795989 | 0          | 39,0653753  | 0           |
| 235059_at                               | U133P | RAB12    | 13,86567164 | 0,094925271 | 61,0610329 | 0,166012851 | 6,76128093 | 0,593812245 | 52,7840909 | 0          | 13,9071856 | 0,20150297 | 27,005814   | 0,16096585 | 20,9338183 | 0          | 8,513172967 | 0           |
| 1552846_s_at                            | U133P | RAB42    | 6,076736002 | 0,049790445 | 3,13506332 | 0,166012851 | 21,6846361 | 0           | 49,870386  | 0          | 35,61167   | 0,07828345 | 10,2241349  | 0,16096585 | 8,39142405 | 0          | 9,912166892 | 0           |
| 223939_at                               | U133P | SUCNR1   | 15,35852373 | 0,049790445 | 5,8933526  | 0,166012851 | 15,2513089 | 0           | 3,49448177 | 0          | 20,3991597 | 0,07828345 | 6,58751696  | 0,16096585 | 12,2589635 | 0          | 34,10341463 | 0           |
| 222749_at                               | U133P | SUFU     | 12,60729229 | 0,049790445 | 4,02519084 | 0,166012851 | 3,06213705 | 0           | 5,2493778  | 0          | 3,37796284 | 0,07828345 | 2,24794304  | 0,16096585 | 5,38864369 | 0          | 2,774533018 | 0           |
| 1554701_a_at                            | U133P | TBC1D16  | 10,14384492 | 0,049790445 | 5,86026107 | 0,278829014 | 10,801057  | 0           | 18,6823606 | 0          | 11,7270469 | 0,07828345 | 11,7200205  | 0,16096585 | 8,04798158 | 0          | 8,13617232  | 0           |
| 222116_s_at                             | U133P | TBC1D16  | 226,1688312 | 0,049790445 | 34,3110454 | 0,166012851 | 227,982327 | 0           | 614,285714 | 0          | 120,623377 | 0,07828345 | 38,1719546  | 0,16096585 | 48,6898949 | 0          | 4,016316647 | 0           |
| 228488_at                               | U133P | TBC1D16  | 16,91770388 | 0,049790445 | 12,1813804 | 0,166012851 | 44,4320843 | 0           | 23,6196701 | 0          | 20,1139677 | 0,07828345 | 12,7546218  | 0,16096585 | 15,5797616 | 0          | 3,531409958 | 0,003674049 |
| 218169_at                               | U133P | VAC14    | 20,76628649 | 0,049790445 | 3,11536454 | 0,166012851 | 12,3085384 | 0           | 8,88172399 | 0          | 13,4333733 | 0,07828345 | 10,8561727  | 0,16096585 | 7,15846606 | 0          | 16,63554007 | 0           |
| <b>Cytoskeleton</b>                     |       |          |             |             |            |             |            |             |            |            |            |            |             |            |            |            |             |             |
| 221754_s_at                             | U133P | CORO1B   | 14,40136054 | 0,049790445 | 3,07108317 | 0,166012851 | 2,4168506  | 0,132499772 | 5,93773373 | 0          | 4,80045351 | 0,07828345 | 5,02929997  | 0,16096585 | 5,90596031 | 0          | 5,005714286 | 0           |
| 64486_at                                | U133P | CORO1B   | 7,878722742 | 0,049790445 | 2,41046675 | 0,166012851 | 2,07839416 | 0,132499772 | 6,20678591 | 0          | 3,71614267 | 0,07828345 | 4,74840452  | 0,16096585 | 3,69067085 | 0          | 4,277698438 | 0           |
| 204750_s_at                             | U133P | DSC2     | 30,5863354  | 0,049790445 | 55,8321995 | 0,166012851 | 5,31713146 | 0,593812245 | 3,7716369  | 0,60581622 | 174,130127 | 0,07828345 | 30,3750308  | 0,16096585 | 48,6139328 | 0          | 293,1190476 | 0           |
| 206710_s_at                             | U133P | EPB41L3  | 76,43162438 | 0,049790445 | 12,9043404 | 0,166012851 | 2,09545976 | 0           | 167,828017 | 0          | 166,85604  | 0,07828345 | 11,0216053  | 0,16096585 | 85,7327405 | 0          | 33,87807097 | 0           |
| 208476_at                               | U133P | FRMD4A   | 9,069588866 | 0,049790445 | 5,36875    | 0,166012851 | 17,950228  | 0           | 6,38532234 | 0          | 12,662825  | 0,07828345 | 16,4616725  | 0,16096585 | 13,2553821 | 0          | 3,663113006 | 0           |
| 225167_at                               | U133P | FRMD4A   | 19,43669092 | 0,049790445 | 5,45197886 | 0,166012851 | 23,8986212 | 0           | 21,5309032 | 0          | 26,1087789 | 0,07828345 | 23,3445573  | 0,16096585 | 14,1870749 | 0          | 5,811068518 | 0           |
| 225168_at                               | U133P | FRMD4A   | 16,90298813 | 0,049790445 | 3,16623217 | 0,278829014 | 50,679215  | 0           | 42,8716777 | 0          | 47,8826531 | 0,07828345 | 40,2946916  | 0,16096585 | 17,0027266 | 0          | 2,677371947 | 0           |
| 208475_at                               | U133P | FRMD4A   | 2,357971495 | 0,415272173 | 2,51023289 | 0,526749974 | 9,17225374 | 0           | 8,6125908  | 0          | 3,76344454 | 0,22860673 | 7,67587397  | 0,16096585 | 2,3321941  | 0,00844097 | 5,277573506 | 0           |
| 232473_at                               | U133P | FRMD4A   | 3,765720232 | 0,415272173 | 2,45465116 | 0,441369819 | 11,0871849 | 0           | 6,55590062 | 0          | 6,10468479 | 0,07828345 | 10,9662338  | 0,16096585 | 3,49831672 | 0          | 4,328776487 | 0           |
| 1560031_at                              | U133P | FRMD4A   | 3,794947735 | 0,550622381 | 4,37673297 | 0,365048611 | 15,3899958 | 0           | 7,94246336 | 0          | 6,34037723 | 0,07828345 | 12,5579384  | 0,16096585 | 8,49685795 | 0          | 4,292216749 | 0           |
| 219106_s_at                             | U133P | KBTBD10  | 3,526073248 | 0,415272173 | 5,24458874 | 0,278829014 | 8,83017493 | 0,132499772 | 7,59085213 | 0,06059553 | 10,6834215 | 0,07828345 | 7,06413994  | 0,16096585 | 7,72993544 | 0          | 2,037133048 | 0,146861656 |
| 201668_x_at                             | U133P | MARCKS   | 4,007941699 | 0,415272173 | 3,38197729 | 0,441369819 | 5,55991912 | 0,132499772 | 5,01895402 | 0,16036085 | 32,3214286 | 0,07828345 | 53,1956845  | 0,16096585 | 3,96686006 | 0          | 2,432285317 | 0,05204955  |
| 205872_x_at                             | U133P | PDE4DIP  | 125,5261495 | 0,049790445 | 15,7807784 | 0,166012851 | 16,1940988 | 0           | 83,1529018 | 0          | 155,949765 | 0,07828345 | 59,9637827  | 0,16096585 | 76,7975895 | 0          | 5,401685648 | 0           |
| 210305_at                               | U133P | PDE4DIP  | 164,277551  | 0,049790445 | 29,3139111 | 0,166012851 | 57,2680706 | 0           | 104,161491 | 0          | 133,714286 | 0,07828345 | 62,49689944 | 0,16096585 | 69,1228431 | 0          | 4,020544923 | 0,003674049 |
| 211751_at                               | U133P | PDE4DIP  | 9,353052234 | 0,049790445 | 12,6377551 | 0,166012851 | 4,32588194 | 0,132499772 | 5,25010598 | 0          | 7,96975547 | 0,20150297 | 4,83411397  | 0,31723588 | 4,49578403 | 0          | 7,053630755 | 0           |
| 212392_s_at                             | U133P | PDE4DIP  | 6,256637168 | 0,049790445 | 4,82829268 | 0,365048611 | 13,972332  | 0           | 8,14516129 | 0          | 7,9082774  | 0,07828345 | 5,6200318   | 0,31723588 | 3,30434623 | 0          | 4,007557865 | 0           |
| 214099_s_at                             | U133P | PDE4DIP  | 7,227782392 | 0,094925271 | 2,26886977 | 0,578623484 | 6,90079695 | 0           | 13,8525078 | 0          | 2,79617313 | 0,56723684 | 2,5714729   | 0,31723588 | 2,45157185 | 0          | 3,248017169 | 0           |
| 1567457_at                              | U133P | RAC1     | 3,86512866  | 0,550622381 | 2,71232877 | 0,632931369 | 2,92427497 | 0,940698927 | 3,06846999 | 0,60581622 | 10,1020408 | 0,20150297 | 5,89285714  | 0,61390985 | 4,44090165 | 0          | 3,444385872 | 0,030862012 |
| 224563_at                               | U133P | WASF2    | 10,47400737 | 0,550622381 | 11,1640489 | 0,441369819 | 6,59824652 | 0,593812245 | 5,57910344 | 0,29183491 | 11,2682755 | 0,22860673 | 7,25859526  | 0,61390985 | 9,90102859 | 0          | 11,79170507 | 0,021157058 |
| <b>Protein binding</b>                  |       |          |             |             |            |             |            |             |            |            |            |            |             |            |            |            |             |             |
| 1569827_at                              | U133P | APG7L    | 4,91771643  | 0,094925271 | 3,43595506 | 0,278829014 | 2,3793962  | 0,940698927 | 2,27056727 | 0,16036085 | 5,79386131 | 0,20150297 | 2,41357537  | 0,61390985 | 2,24718932 | 0,00844097 | 2,477450716 | 0,003674049 |
| 230292_at                               | U133P | CHC1L    | 17,75844156 | 0,049790445 | 2,05443451 | 1,021589699 | 2,96015427 | 0,318779683 | 3,23036832 | 0,06059553 | 7,73470134 | 0,07828345 | 8,32499719  | 0,16096585 | 2,83529694 | 0,00844097 | 19,7777036  | 0           |
| 205003_at                               | U133P | DOCK4    | 56,74054622 | 0,049790445 | 17,8686735 | 0,166012851 | 11,1288603 | 0           | 5,32480975 | 0          | 42,5867234 | 0,07828345 | 40,2331297  | 0,16096585 | 16,1940773 | 0          | 9,026276579 | 0           |
| 201411_s_at                             | U133P | PLEKH2   | 5,953921191 | 0,049790445 | 7,89230115 | 0,166012851 | 2,68766803 | 0           | 3,88140004 | 0          | 5,24348337 | 0,07828345 | 6,13698304  | 0,16096585 | 7,84837211 | 0          | 4,330714052 | 0           |
| 227741_at                               | U133P | PTPLB    | 2,821508828 | 0,550622381 | 4,98996972 | 0,166012851 | 3,19917979 | 0,593812245 | 8,75572823 | 0          | 3,28339809 | 0,22860673 | 2,90865968  | 0,61390985 | 2,36008503 | 0,00447705 | 2,328486062 | 0,021157058 |
| 225418_at                               | U133P | PVRL2    | 4,040480933 | 0,049790445 | 3,91459884 | 0,166012851 | 5,13564104 | 0           | 4,95679724 | 0          | 8,1754189  | 0,07828345 | 3,06624555  | 0,31723588 | 5,34713354 | 0          | 3,033854619 | 0           |
| 1552806_a_at                            | U133P | SIGLEC10 | 9,097450227 | 0,225862787 | 11,7881874 | 0,166012851 | 8,19211172 | 0           | 4,65572716 | 0,60581622 | 15,3690919 | 0,07828345 | 20,7753051  | 0,16096585 | 15,9155588 | 0          | 47,17410007 | 0           |
| 204787_at                               | U133P | VSIG4    | 106,8229762 | 0,049790445 | 14,2884541 | 0,166012851 | 6,94015975 | 0           | 135,693804 | 0          | 189,157744 | 0,07828345 | 182,639559  | 0,16096585 | 63,2119789 | 0          | 224,3470899 | 0           |
| 224730_at                               | U133P | WDR68    | 5,469017958 | 0,049790445 | 7,45238095 | 0,166012851 | 5,20269646 | 0           | 8,8808019  | 0          | 5,26222388 | 0,07828345 | 2,26912079  | 0,61390985 | 4,90119427 | 0          | 5,395690343 | 0           |
| 221745_at                               | U133P | WDR68    | 4,531024531 | 0,094925271 | 3,53531218 | 0,166012851 | 4,86807983 | 0           | 5,28975741 | 0          | 7,58654015 | 0,07828345 | 2,549228    | 0,5514082  | 2,90163399 | 0          | 5,757626271 | 0           |
| <b>Cell organization and biogenesis</b> |       |          |             |             |            |             |            |             |            |            |            |            |             |            |            |            |             |             |
| 202767_at                               | U133P | ACP2     | 15,65057009 | 0,049790445 | 3,72228426 | 0,166012851 | 6,64587605 | 0           | 9,68686002 | 0          | 7,88078352 | 0,07828345 | 4,39978631  | 0,16096585 | 2,95852931 | 0          | 3,720273155 | 0           |
| 204638_at                               | U133P | ACP5     | 7,829952819 | 0,049790445 | 8,03955451 | 0,166012851 | 22,2274999 | 0           | 57,7513095 | 0          | 16,1040416 | 0,07828345 | 40,7018963  | 0,16096585 | 18,4032853 | 0          | 156,17366   | 0           |

|                        |       |           |              |             |            |             |             |             |            |            |            |            |            |            |             |            |             |             |
|------------------------|-------|-----------|--------------|-------------|------------|-------------|-------------|-------------|------------|------------|------------|------------|------------|------------|-------------|------------|-------------|-------------|
| 227642_at              | U133P | TFCP2L1   | 5,831356369  | 0,094925271 | 4,49493143 | 0,365048611 | 11,1360615  | 0           | 26,8542928 | 0          | 4,8289558  | 0,07828345 | 7,84309645 | 0,16096585 | 13,9958918  | 0          | 25,23883929 | 0           |
| 225868_at              | U133P | TRIM47    | 20,05811138  | 0,049790445 | 4,43849121 | 0,166012851 | 44,1577825  | 0           | 49,9758687 | 0          | 23,859447  | 0,07828345 | 3,10383071 | 0,5514082  | 4,95795436  | 0          | 6,174409938 | 0           |
| <b>Immune response</b> |       |           |              |             |            |             |             |             |            |            |            |            |            |            |             |            |             |             |
| 218831_s_at            | U133P | FCGRT     | 22,40525341  | 0,049790445 | 8,0165636  | 0,166012851 | 2,40313807  | 0           | 3,11277473 | 0          | 22,3966517 | 0,07828345 | 28,2695153 | 0,16096585 | 9,70849358  | 0          | 16,24227358 | 0           |
| 233177_s_at            | U133P | MR-1      | 8,045938553  | 0,049790445 | 7,28518791 | 0,166012851 | 5,10218827  | 0           | 11,3863401 | 0          | 15,8565013 | 0,07828345 | 2,58597238 | 0,31723588 | 9,5421326   | 0          | 13,47886684 | 0           |
| <b>Others</b>          |       |           |              |             |            |             |             |             |            |            |            |            |            |            |             |            |             |             |
| 1556314_a_a            | U133P | ---       | 19,10494245  | 0,049790445 | 2,58690869 | 0,632931369 | 6,9263623   | 0,132499772 | 26,0409745 | 0          | 37,3253968 | 0,07828345 | 33,2602546 | 0,16096585 | 14,4009885  | 0          | 43,81677019 | 0           |
| 227684_at              | U133P | ---       | 3,845375174  | 0,049790445 | 5,19487179 | 0,166012851 | 8,86295233  | 0           | 12,4069175 | 0          | 4,6146137  | 0,07828345 | 6,38520498 | 0,16096585 | 3,01858486  | 0          | 2,472058178 | 0,021157058 |
| 227853_at              | U133P | ---       | 12,80296886  | 0,049790445 | 5,19262638 | 0,166012851 | 4,17245197  | 0           | 23,1619601 | 0          | 8,37648684 | 0,07828345 | 10,0399626 | 0,16096585 | 5,88625211  | 0          | 2,452610595 | 0           |
| 228101_at              | U133P | ---       | 7,94010989   | 0,049790445 | 2,2005482  | 0,632931369 | 3,7562383   | 0           | 5,71547224 | 0          | 4,04314252 | 0,07828345 | 7,98309579 | 0,16096585 | 4,44776543  | 0          | 3,258766649 | 0,003674049 |
| 228478_at              | U133P | ---       | 4,348750151  | 0,049790445 | 3,39335689 | 0,166012851 | 4,78609306  | 0           | 3,78472113 | 0          | 4,73455865 | 0,07828345 | 10,8879819 | 0,16096585 | 5,79914411  | 0          | 2,32221246  | 0           |
| 229121_at              | U133P | ---       | 42,82822874  | 0,049790445 | 12,4962505 | 0,166012851 | 31,1996817  | 0           | 144,274892 | 0          | 16,5487363 | 0,07828345 | 120,533454 | 0,16096585 | 41,704733   | 0          | 10,0550611  | 0           |
| 229296_at              | U133P | ---       | 53,90846047  | 0,049790445 | 18,3512748 | 0,166012851 | 10,63711    | 0           | 46,5039483 | 0          | 84,9017038 | 0,07828345 | 85,6878307 | 0,16096585 | 46,871158   | 0          | 2,253250047 | 0,095721731 |
| 229635_at              | U133P | ---       | 5,660845588  | 0,049790445 | 5,54222908 | 0,166012851 | 3,06967703  | 0           | 4,19664759 | 0          | 11,880787  | 0,07828345 | 10,6043388 | 0,16096585 | 8,08969904  | 0          | 15,72176133 | 0           |
| 229951_x_at            | U133P | ---       | 29,236602484 | 0,049790445 | 10,6192893 | 0,166012851 | 9,89593188  | 0           | 34,0901684 | 0          | 15,3260073 | 0,07828345 | 14,4375431 | 0,16096585 | 22,131112   | 0          | 2,555548015 | 0,009971334 |
| 229968_at              | U133P | ---       | 6,862487361  | 0,049790445 | 3,89290397 | 0,166012851 | 3,80778725  | 0           | 2,27301264 | 0          | 8,88118294 | 0,07828345 | 7,3214671  | 0,16096585 | 3,99557309  | 0          | 34,10552764 | 0           |
| 230278_at              | U133P | ---       | 11,1027259   | 0,049790445 | 7,53107345 | 0,166012851 | 3,28428079  | 0           | 29,0126632 | 0          | 6,21946047 | 0,07828345 | 17,1697892 | 0,16096585 | 19,9063689  | 0          | 17,06488216 | 0           |
| 230391_at              | U133P | ---       | 6,807841808  | 0,049790445 | 13,0630035 | 0,166012851 | 5,5085623   | 0           | 30,5285067 | 0          | 3,28902954 | 0,07828345 | 5,58998599 | 0,16096585 | 29,2587846  | 0          | 101,5676359 | 0           |
| 238727_at              | U133P | ---       | 15,64332264  | 0,049790445 | 15,5484269 | 0,166012851 | 12,9516958  | 0           | 19,4836116 | 0          | 41,6732804 | 0,07828345 | 19,3996305 | 0,16096585 | 18,1033521  | 0          | 50,29901879 | 0           |
| 240856_at              | U133P | ---       | 11,89080983  | 0,049790445 | 11,0558376 | 0,166012851 | 8,0191458   | 0,132499772 | 26,3680387 | 0          | 6,455246   | 0,20150297 | 14,9587912 | 0,16096585 | 9,57478625  | 0          | 12,83063281 | 0           |
| 241418_at              | U133P | ---       | 4,026404594  | 0,049790445 | 3,38156325 | 0,166012851 | 5,26083728  | 0           | 4,13505034 | 0          | 7,44841635 | 0,07828345 | 3,3373572  | 0,16096585 | 4,65227775  | 0          | 3,71112018  | 0           |
| 242281_at              | U133P | ---       | 42,14748353  | 0,049790445 | 16,8670332 | 0,166012851 | 5,99635398  | 0           | 10,114999  | 0          | 97,3442559 | 0,07828345 | 63,7593315 | 0,16096585 | 50,790877   | 0          | 73,62563265 | 0           |
| 242465_at              | U133P | ---       | 6,364872416  | 0,049790445 | 6,43559322 | 0,166012851 | 8,99052881  | 0           | 10,6358543 | 0          | 6,53003898 | 0,07828345 | 15,5870279 | 0,16096585 | 8,40205252  | 0          | 8,406125085 | 0           |
| 244352_at              | U133P | ---       | 5,720689069  | 0,049790445 | 8,21357091 | 0,166012851 | 5,95403234  | 0           | 17,7784235 | 0          | 2,67427999 | 0,07828345 | 4,7278577  | 0,16096585 | 18,1547262  | 0          | 47,20738836 | 0           |
| 244434_at              | U133P | ---       | 19,67032967  | 0,049790445 | 23,3358896 | 0,166012851 | 28,5996241  | 0           | 35,7495301 | 0          | 56,0198822 | 0,07828345 | 40,1027939 | 0,16096585 | 25,5194205  | 0          | 67,92410714 | 0           |
| 236673_at              | U133P | ---       | 5,417859338  | 0,094925271 | 3,45564516 | 0,365048611 | 16,4702114  | 0           | 19,1294643 | 0          | 18,0928923 | 0,07828345 | 10,202381  | 0,16096585 | 4,24511155  | 0          | 48,433281   | 0           |
| 237393_at              | U133P | ---       | 2,924919171  | 0,094925271 | 4,00886263 | 0,166012851 | 4,81433302  | 0           | 4,33684883 | 0          | 2,83278825 | 0,07828345 | 5,640848   | 0,16096585 | 3,18271051  | 0          | 4,916419262 | 0           |
| 236147_at              | U133P | ---       | 2,20717671   | 0,415272173 | 3,15204254 | 0,166012851 | 2,9911001   | 0           | 5,114929   | 0          | 5,19770408 | 0,07828345 | 4,742508   | 0,16096585 | 2,22551016  | 0          | 5,666485606 | 0           |
| 238720_at              | U133P | ---       | 6,641163185  | 0,415272173 | 8,44935345 | 0,365048611 | 6,42283748  | 0,318779683 | 8,77854904 | 0,06059553 | 8,02394597 | 0,22860673 | 13,5610515 | 0,16096585 | 6,23255829  | 0          | 11,92698694 | 0           |
| 238780_s_at            | U133P | ---       | 9,47578998   | 0,415272173 | 3,51410239 | 0,933925829 | 10,28923668 | 0,593812245 | 11,5130945 | 0,16036085 | 15,1068843 | 0,20150297 | 13,3745421 | 0,31723588 | 6,09655107  | 0,01866271 | 26,38574774 | 0           |
| 216555_at              | U133P | ---       | 2,183370846  | 0,550622381 | 5,18096136 | 0,166012851 | 3,89140592  | 0           | 4,51832977 | 0          | 3,76816562 | 0,20150297 | 3,30229485 | 0,16096585 | 2,68607519  | 0          | 3,48628508  | 0           |
| 242964_at              | U133P | ---       | 8,924758516  | 0,550622381 | 8,76873127 | 0,526749774 | 16,4557555  | 0,132499772 | 15,2360701 | 0          | 13,0890248 | 0,20150297 | 21,0038287 | 0,16096585 | 12,6508523  | 0          | 27,63478945 | 0           |
| 1569100_a_a            | U133P | ---       | 14,41558442  | 0,71232686  | 8,27476038 | 0,576632484 | 27,1619403  | 0,940989927 | 17,961165  | 0,79985209 | 36,2745098 | 0,56723684 | 33,6363636 | 0,95244936 | 9,9533997   | 0,00447705 | 32,64705882 | 0,009971334 |
| 225847_at              | U133P | AADACL1   | 23,60398835  | 0,049790445 | 10,8927437 | 0,166012851 | 2,23839982  | 0,318779683 | 29,5963887 | 0          | 13,9246674 | 0,07828345 | 17,1235158 | 0,16096585 | 11,4787016  | 0          | 2,735690253 | 0,003674049 |
| 224435_at              | U133P | C10orf58  | 6,817630567  | 0,049790445 | 2,16726775 | 0,166012851 | 16,9128494  | 0           | 23,1157979 | 0          | 7,86097704 | 0,07828345 | 2,19152414 | 0,16096585 | 2,44731194  | 0          | 36,49952003 | 0           |
| 228155_at              | U133P | C10orf58  | 9,39076618   | 0,049790445 | 3,83469164 | 0,166012851 | 10,400282   | 0           | 23,1930406 | 0          | 6,84551788 | 0,07828345 | 2,06073839 | 0,5514082  | 2,59358956  | 0          | 32,29555892 | 0           |
| 213246_at              | U133P | C14orf109 | 13,80362349  | 0,049790445 | 2,87072326 | 0,166012851 | 3,53357926  | 0           | 5,13741629 | 0          | 4,70593664 | 0,07828345 | 4,36855772 | 0,16096585 | 4,77220045  | 0          | 5,468044299 | 0           |
| 223124_s_at            | U133P | C1orf128  | 2,165939324  | 0,049790445 | 6,9381316  | 0,166012851 | 4,91387537  | 0           | 6,34463143 | 0          | 2,38356259 | 0,07828345 | 2,93460296 | 0,16096585 | 3,6050361   | 0          | 2,787930743 | 0           |
| 1558693_s_a            | U133P | C1orf85   | 27,68693918  | 0,049790445 | 10,4735991 | 0,166012851 | 6,7779947   | 0           | 11,9533402 | 0          | 17,6026876 | 0,07828345 | 12,7175307 | 0,16096585 | 7,62110872  | 0          | 10,34778288 | 0           |
| 225401_at              | U133P | C1orf85   | 27,15861371  | 0,049790445 | 7,11128144 | 0,166012851 | 5,42606744  | 0           | 11,5902319 | 0          | 17,1356062 | 0,07828345 | 12,8099943 | 0,16096585 | 7,87036678  | 0          | 7,540774039 | 0           |
| 225825_at              | U133P | C20orf194 | 5,771743235  | 0,049790445 | 8,2243141  | 0,166012851 | 2,66297909  | 0           | 11,6089466 | 0          | 4,59424123 | 0,07828345 | 3,89727442 | 0,16096585 | 8,98603901  | 0          | 3,524847227 | 0           |
| 226607_at              | U133P | C20orf194 | 12,65117637  | 0,049790445 | 4,8998779  | 0,166012851 | 3,60506668  | 0           | 17,0846736 | 0          | 6,11034039 | 0,07828345 | 4,04291759 | 0,16096585 | 13,89010222 | 0          | 4,040648512 | 0           |
| 224742_at              | U133P | C20orf22  | 7,386629637  | 0,049790445 | 3,33604669 | 0,166012851 | 7,22972973  | 0           | 14,1948765 | 0          | 9,36896135 | 0,07828345 | 8,36613642 | 0,16096585 | 3,96260432  | 0          | 8,815340909 | 0           |
| 228123_s_at            | U133P | C20orf22  | 23,54025974  | 0,049790445 | 7,54135936 | 0,166012851 | 13,0241035  | 0           | 27,8269972 | 0          | 10,8534196 | 0,07828345 | 13,0959606 | 0,16096585 | 6,7507408   | 0          | 8,346264533 | 0           |
| 228124_at              | U133P | C20orf22  | 14,99519059  | 0,049790445 | 5,42136785 | 0,166012851 | 7,62983305  | 0           | 35,6013702 | 0          | 6,90919387 | 0,07828345 | 8,58029599 | 0,16096585 | 4,62702301  | 0          | 7,501102671 | 0           |
| 212421_at              | U133P | C2orf9    | 3,424075051  | 0,049790445 | 3,18429611 | 0,166012851 | 2,12754289  | 0           | 2,75015662 | 0          | 6,52150469 | 0,07828345 | 5,02271839 | 0,16096585 | 2,92143635  | 0          | 5,387043951 | 0           |
| 221245_s_at            | U133P | C2orf31   | 38,91032096  | 0,049790445 | 8,47604359 | 0,166012851 | 11,7533504  | 0           | 12,0221081 | 0          | 36,5287132 | 0,07828345 | 7,23571955 | 0,16096585 | 10,3478729  | 0          | 5,510929875 | 0           |
| 239529_at              | U133P | C5orf20   | 5,024746907  | 0,225862787 | 4,70086819 | 0,365048611 | 6,67862749  | 0           | 12,7373824 | 0          | 10,2266484 | 0,07828345 | 8,42432815 | 0,16096585 | 4,16540194  | 0          | 12,09749492 | 0           |
| 226301_at              | U133P | C6orf192  | 2,424772956  | 0,225862787 | 5,47696784 | 0,166012851 | 2,2079166   | 0,940698927 | 48,1677328 | 0          | 3,62856544 | 0,07828345 | 8,80796423 | 0,16096585 | 6,53610025  | 0          | 8,068655561 | 0           |
| 1569403_at             | U133P | C7orf10   | 2,586005831  | 0,049790445 | 2,93708609 | 0,166012851 | 5,95835199  | 0           | 6,05320201 | 0          | 4,11410019 | 0,07828345 | 7,69519954 | 0,16096585 | 4,3831443   | 0          | 7,811154599 | 0           |
| 229958_at              | U133P | C8orf61   | 3,453124639  | 0,049790445 | 3,66558681 | 0,166012851 | 6,00902815  | 0           | 18,1621188 | 0          | 5,06284575 | 0,07828345 | 3,55685423 | 0,16096585 | 8,33404334  | 0          | 5,147613303 | 0           |
| 232136_s_at            | U133P | CTTNBP2   | 18,70894526  | 0,049790445 | 21,0405405 | 0,166012851 | 39,4843618  | 0           | 123,571429 | 0          | 31,0365449 | 0,07828345 | 133,457143 | 0,16096585 | 10,7408474  | 0          | 42,25555974 | 0           |
| 219468_s_at            | U133P | CUEDC1    | 14,66340509  | 0,049       |            |             |             |             |            |            |            |            |            |            |             |            |             |             |



|              |       |           |             |             |            |             |            |             |            |            |            |            |            |            |            |            |             |             |
|--------------|-------|-----------|-------------|-------------|------------|-------------|------------|-------------|------------|------------|------------|------------|------------|------------|------------|------------|-------------|-------------|
| 226738_at    | U133P | FLJ33817  | 3,06818914  | 0,094925271 | 2,91580774 | 0,166012851 | 3,80614909 | 0           | 7,83137814 | 0          | 3,62496828 | 0,07828345 | 4,45894067 | 0,16096585 | 3,51390107 | 0          | 4,246993101 | 0           |
| 1556558_s_at | U133P | FLJ36665  | 6,379310345 | 0,094925271 | 6,60714286 | 0,278829014 | 12,8472222 | 0           | 9,84042553 | 0          | 7,77310924 | 0,07828345 | 4,74358974 | 0,5514082  | 2,92262719 | 0,01866271 | 4,466800805 | 0,003674049 |
| 242951_at    | U133P | FLJ37794  | 3,075503807 | 0,094925271 | 6,31677704 | 0,166012851 | 2,44051173 | 0           | 8,60601504 | 0          | 3,38959962 | 0,07828345 | 4,28946185 | 0,16096585 | 5,29024158 | 0          | 7,564269193 | 0           |
| 1553141_at   | U133P | FLJ38725  | 14,83033096 | 0,049790445 | 11,1204188 | 0,166012851 | 35,9853619 | 0           | 37,4788255 | 0          | 32,4175824 | 0,07828345 | 41,7715544 | 0,16096585 | 13,6397009 | 0          | 16,63533835 | 0           |
| 1553142_at   | U133P | FLJ38725  | 64,73809524 | 0,049790445 | 64,9199438 | 0,166012851 | 53,0810749 | 0           | 105,483797 | 0          | 86,8853383 | 0,07828345 | 43,2152206 | 0,16096585 | 90,8873183 | 0          | 14,01971489 | 0           |
| 228937_at    | U133P | FLJ38725  | 100,0226105 | 0,049790445 | 30,8098012 | 0,166012851 | 19,3961256 | 0           | 51,6154695 | 0          | 57,2428477 | 0,07828345 | 23,1225766 | 0,16096585 | 47,9684415 | 0          | 4,987316733 | 0           |
| 227570_at    | U133P | FLJ90119  | 7,898826386 | 0,049790445 | 6,72107438 | 0,166012851 | 7,16709262 | 0           | 14,1336462 | 0          | 34,6801706 | 0,07828345 | 10,7373911 | 0,16096585 | 6,03710253 | 0          | 19,48487571 | 0           |
| 238710_at    | U133P | FLJ90119  | 5,202257202 | 0,049790445 | 2,416      | 0,166012851 | 3,63281898 | 0           | 5,69737184 | 0          | 4,62017303 | 0,07828345 | 5,04086566 | 0,16096585 | 4,81982415 | 0          | 8,31784725  | 0           |
| 202528_at    | U133P | GALE      | 4,11822032  | 0,049790445 | 2,18656608 | 0,278829014 | 3,73809524 | 0           | 5,69313289 | 0          | 4,96115866 | 0,07828345 | 2,86932684 | 0,16096585 | 3,14990028 | 0          | 2,907360671 | 0           |
| 203308_x_at  | U133P | HPS1      | 4,615539108 | 0,049790445 | 5,19412356 | 0,166012851 | 2,26380194 | 0,132499772 | 2,41398226 | 0          | 2,98757764 | 0,07828345 | 3,22215298 | 0,16096585 | 5,39957284 | 0          | 3,071428571 | 0           |
| 204544_at    | U133P | HPS5      | 7,538206573 | 0,049790445 | 5,19953572 | 0,166012851 | 4,21472193 | 0           | 5,77854915 | 0          | 4,93164395 | 0,07828345 | 4,52696371 | 0,16096585 | 4,66669152 | 0          | 2,362819022 | 0           |
| 226559_at    | U133P | IER5L     | 3,93178022  | 0,049790445 | 4,43690476 | 0,166012851 | 2,86405902 | 0           | 8,99372587 | 0          | 5,02291105 | 0,07828345 | 4,70343261 | 0,16096585 | 4,91680993 | 0          | 2,494784403 | 0           |
| 227154_at    | U133P | IGSF21    | 16,29276316 | 0,225862787 | 3,82682119 | 0,690451601 | 7,07369323 | 0,940698927 | 12,2659733 | 0,29183491 | 36,5265487 | 0,07828345 | 26,2898089 | 0,31723588 | 9,07221357 | 0          | 37,73714286 | 0           |
| 201728_s_at  | U133P | KIAA0100  | 2,104308021 | 1,031279884 | 3,11881393 | 0,526749774 | 3,42800363 | 0,940698927 | 4,52131324 | 0,06059553 | 4,46051776 | 0,20150297 | 3,11231854 | 0,61390985 | 2,69181036 | 0          | 4,053669345 | 0           |
| 219387_at    | U133P | KIAA1212  | 9,625335295 | 0,049790445 | 10,1700494 | 0,166012851 | 3,29015084 | 0,318779683 | 32,2210636 | 0          | 23,2739141 | 0,07828345 | 3,22289052 | 0,31723588 | 4,49354189 | 0          | 8,787076899 | 0           |
| 226460_at    | U133P | KIAA1450  | 30,91524387 | 0,049790445 | 8,91123843 | 0,166012851 | 4,27497378 | 0           | 23,6144072 | 0          | 6,79586459 | 0,07828345 | 4,96513044 | 0,16096585 | 5,81039028 | 0          | 4,668180174 | 0           |
| 224853_at    | U133P | KIAA1458  | 3,569899052 | 0,049790445 | 2,06329562 | 0,441369819 | 2,68720641 | 0           | 2,55696757 | 0,29183491 | 2,0450722  | 0,56723684 | 3,66244037 | 0,16096585 | 2,58601196 | 0          | 2,748037677 | 0           |
| 238506_at    | U133P | LOC116064 | 2,803113553 | 0,094925271 | 2,06964165 | 0,365048611 | 4,20467033 | 0           | 3,00335595 | 0,06059553 | 3,07947686 | 0,07828345 | 3,8766464  | 0,16096585 | 2,37797746 | 0          | 4,52364532  | 0           |
| 238654_at    | U133P | LOC147645 | 12,76895669 | 0,049790445 | 28,1073529 | 0,166012851 | 13,4902597 | 0           | 21,9487827 | 0          | 37,609209  | 0,07828345 | 7,80122449 | 0,16096585 | 18,2574858 | 0          | 6,87044304  | 0           |
| 1561342_at   | U133P | LOC150005 | 3,078325123 | 0,550622381 | 2,88105118 | 0,526749774 | 7,22260749 | 0,132499772 | 5,06073858 | 0,16036085 | 8,85629252 | 0,07828345 | 5,70060208 | 0,31723588 | 2,01158096 | 0,36047698 | 6,104209304 | 0           |
| 238422_at    | U133P | LOC151534 | 2,7210676   | 0,094925271 | 3,0886516  | 0,166012851 | 4,09414088 | 0           | 10,9412386 | 0          | 7,56109422 | 0,07828345 | 5,1176761  | 0,16096585 | 5,60467072 | 0          | 6,187546638 | 0           |
| 226273_at    | U133P | LOC158563 | 2,878981417 | 0,415272173 | 6,14511873 | 0,166012851 | 3,97413146 | 0           | 7,95967191 | 0          | 5,79237963 | 0,07828345 | 5,73249975 | 0,16096585 | 4,41847021 | 0          | 5,454332553 | 0           |
| 228845_at    | U133P | LOC196463 | 10,75991649 | 0,049790445 | 4,24047955 | 0,166012851 | 3,7331595  | 0           | 23,0913978 | 0          | 11,7189632 | 0,07828345 | 9,20685959 | 0,16096585 | 4,79487518 | 0          | 3,636620215 | 0           |
| 214719_at    | U133P | LOC283537 | 3,888513985 | 0,049790445 | 3,55638868 | 0,166012851 | 3,42494621 | 0           | 5,5983616  | 0          | 2,86961353 | 0,07828345 | 4,56565299 | 0,16096585 | 3,87464409 | 0          | 4,174529996 | 0           |
| 235751_s_at  | U133P | LOC284013 | 42,00989011 | 1,031279884 | 13,628877  | 0,632931369 | 15,5858611 | 0,940698927 | 137,911255 | 0          | 86,6870748 | 0,22860673 | 89,2366947 | 0,5514082  | 27,0371218 | 0,00447705 | 2,140211899 | 0,837584124 |
| 232504_at    | U133P | LOC285628 | 11,66628571 | 0,049790445 | 3,23857868 | 0,166012851 | 11,0811984 | 0           | 13,2571429 | 0          | 3,33246278 | 0,56723684 | 2,39063232 | 0,61390985 | 3,15786192 | 0,00447705 | 23,39495798 | 0           |
| 227300_at    | U133P | LOC338773 | 24,0826686  | 0,049790445 | 17,6742948 | 0,166012851 | 28,4771051 | 0           | 11,0589411 | 0          | 15,7827203 | 0,07828345 | 181,079607 | 0,16096585 | 18,2439377 | 0          | 2,817411222 | 0           |
| 227040_at    | U133P | LOC387921 | 14,12708693 | 0,049790445 | 2,60179376 | 0,166012851 | 2,82764821 | 0           | 8,88895945 | 0          | 7,82458004 | 0,07828345 | 6,44919022 | 0,16096585 | 4,64597614 | 0          | 6,266202819 | 0           |
| 227969_at    | U133P | LOC400960 | 5,225732448 | 0,049790445 | 3,02556865 | 0,166012851 | 4,65204738 | 0           | 3,04905799 | 0,06059553 | 3,28863784 | 0,07828345 | 3,31459857 | 0,16096585 | 4,49458646 | 0          | 11,27777205 | 0           |
| 229826_at    | U133P | LOC440957 | 9,001744524 | 0,049790445 | 8,09623431 | 0,166012851 | 4,91865785 | 0           | 24,3549402 | 0          | 15,0642273 | 0,07828345 | 7,81976157 | 0,16096585 | 3,54861302 | 0          | 3,048844538 | 0           |
| 1552302_at   | U133P | MGC20235  | 5,844782227 | 0,049790445 | 6,73621138 | 0,166012851 | 8,77435492 | 0           | 34,4622544 | 0          | 15,216895  | 0,07828345 | 4,27846964 | 0,16096585 | 10,2614288 | 0          | 17,51642576 | 0           |
| 1552303_a_a  | U133P | MGC20235  | 5,501743116 | 0,049790445 | 4,05912953 | 0,166012851 | 4,66017678 | 0           | 10,6028626 | 0          | 7,65250082 | 0,07828345 | 2,98851015 | 0,16096585 | 4,8637343  | 0          | 11,56142734 | 0           |
| 1558703_at   | U133P | MGC9564   | 12,44956611 | 0,049790445 | 3,07140884 | 0,166012851 | 11,5014999 | 0           | 34,7561738 | 0          | 37,4612534 | 0,07828345 | 10,992091  | 0,16096585 | 3,71302748 | 0          | 5,469235499 | 0           |
| 214120_at    | U133P | RFPL1S    | 2,945529291 | 0,71232465  | 7,32992327 | 0,166012851 | 7,23372034 | 0           | 13,7392138 | 0          | 4,16085947 | 0,22860673 | 5,11785714 | 0,31723588 | 8,51021744 | 0          | 7,962954388 | 0           |
| 224674_at    | U133P | TTYH3     | 7,107122691 | 0,049790445 | 7,78605514 | 0,166012851 | 3,17894486 | 0           | 10,0085196 | 0          | 11,1643731 | 0,07828345 | 6,35885333 | 0,16096585 | 9,68073929 | 0          | 5,329401624 | 0           |

Table S2. Common secreted and extracellular matrix-associated osteoclast genes identified in our study and in Pederson *et al.* study(1)

| Chip  | Probeset     | Gene      | Banding       | Affymetrix description                                                                        |
|-------|--------------|-----------|---------------|-----------------------------------------------------------------------------------------------|
| U133P | 206134_at    | ADAMDEC1  | 8p21.2        | ADAM-like; decysin 1                                                                          |
| U133P | 218232_at    | C1QA      | 1p36.3-p34.1  | complement component 1; q subcomponent; alpha polypeptide                                     |
| U133P | 202953_at    | C1QB      | 1p36.3-p34.1  | complement component 1; q subcomponent; beta polypeptide                                      |
| U133P | 225353_s_at  | C1QG      | 1p36.11       | complement component 1; q subcomponent; gamma polypeptide                                     |
| U133P | 208075_s_at  | CCL7      | 17q11.2-q12   | chemokine (C-C motif) ligand 7 /// chemokine (C-C motif) ligand 7                             |
| U133P | 214038_at    | CCL8      | 17q11.2       | chemokine (C-C motif) ligand 8                                                                |
| U133P | 203104_at    | CSF1R     | 5q33-q35      | colony stimulating factor 1 receptor                                                          |
| U133P | 213274_s_at  | CTSB      | 8p22          | cathepsin B                                                                                   |
| U133P | 213275_x_at  | CTSB      | 8p22          | cathepsin B                                                                                   |
| U133P | 227961_at    | CTSB      | 8p22          | cathepsin B                                                                                   |
| U133P | 225646_at    | CTSC      | 11q14.1-q14.3 | cathepsin C                                                                                   |
| U133P | 225647_s_at  | CTSC      | 11q14.1-q14.3 | cathepsin C                                                                                   |
| U133P | 202450_s_at  | CTSK      | 1q21          | cathepsin K (pseudodeficiency)                                                                |
| U133P | 214974_x_at  | CXCL5     | 4q12-q13      | chemokine (C-X-C motif) ligand 5                                                              |
| U133P | 215101_s_at  | CXCL5     | 4q12-q13      | chemokine (C-X-C motif) ligand 5                                                              |
| U133P | 230631_s_at  | IFNAR2    | 21q22.1       | Interferon (alpha; beta and omega) receptor 2                                                 |
| U133P | 230632_at    | IFNAR2    | 21q22.1       | Interferon (alpha; beta and omega) receptor 2                                                 |
| U133P | 209541_at    | IGF1      | 12q22-q23     | insulin-like growth factor 1 (somatomedin C)                                                  |
| U133P | 209542_x_at  | IGF1      | 12q22-q23     | insulin-like growth factor 1 (somatomedin C)                                                  |
| U133P | 211577_s_at  | IGF1      | 12q22-q23     | insulin-like growth factor 1 (somatomedin C)                                                  |
| U133P | 207433_at    | IL10      | 1q31-q32      | interleukin 10                                                                                |
| U133P | 222868_s_at  | IL18BP    | 11q13         | interleukin 18 binding protein                                                                |
| U133P | 204575_s_at  | MMP19     | 12q14         | matrix metalloproteinase 19                                                                   |
| U133P | 209785_s_at  | PLA2G4C   | 19q13.3       | phospholipase A2; group IVC (cytosolic; calcium-independent)                                  |
| U133P | 206214_at    | PLA2G7    | 6p21.2-p12    | phospholipase A2; group VII (platelet-activating factor acetylhydrolase; plasma)              |
| U133P | 208381_s_at  | SGPL1     | 10q21         | sphingosine-1-phosphate lyase 1                                                               |
| U133P | 212321_at    | SGPL1     | 10q21         | sphingosine-1-phosphate lyase 1                                                               |
| U133P | 212322_at    | SGPL1     | 10q21         | sphingosine-1-phosphate lyase 1                                                               |
| U133P | 1568574_x_at | SPP1      | 4q21-q25      | Secreted phosphoprotein 1 (osteopontin; bone sialoprotein I; early T-lymphocyte activation 1) |
| U133P | 209875_s_at  | SPP1      | 4q21-q25      | secreted phosphoprotein 1 (osteopontin; bone sialoprotein I; early T-lymphocyte activation 1) |
| U133P | 207037_at    | TNFRSF11A | 18q22.1       | tumor necrosis factor receptor superfamily; member 11a; NFkB activator                        |
| U133P | 238846_at    | TNFRSF11A | 18q22.1       | tumor necrosis factor receptor superfamily; member 11a; NFkB activator                        |
| U133P | 219725_at    | TREM2     | 6p21.1        | triggering receptor expressed on myeloid cells 2                                              |

(1) Regulation of bone formation by osteoclasts involves Wnt/BMP signaling and the chemokine sphingosine-1-phosphate.

Pederson L, Ruan M, Westendorf JJ, Khosla S, Oursler MJ. Proc Natl Acad Sci U S A. 2008 Dec 30;105(52):20764-9. Epub 2008 Dec 15.

Figure S1

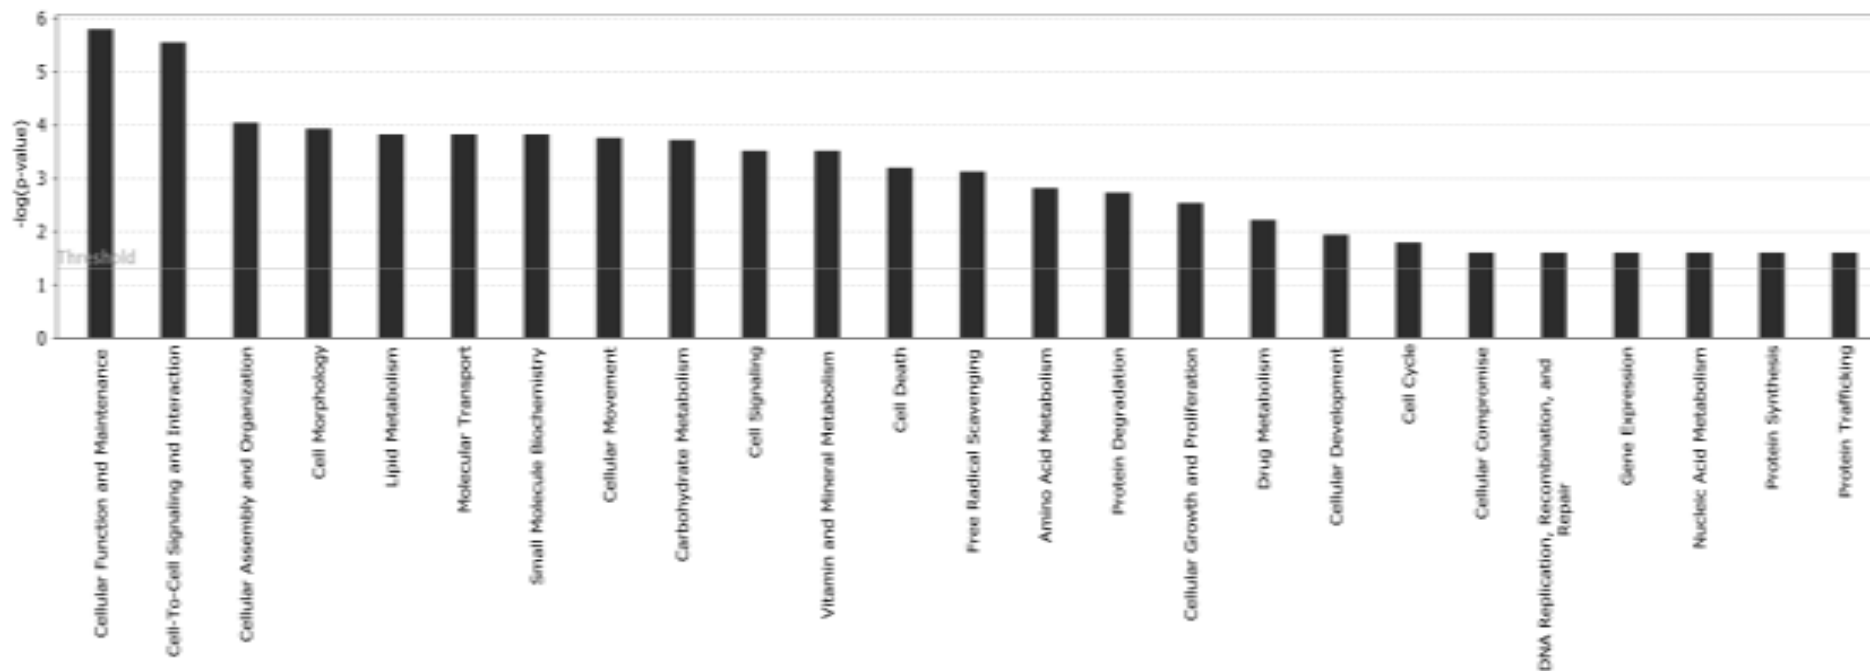

Figure S1. Major pathways of osteoclast gene signature

The *networks* were generated through the use of Ingenuity Pathways Analysis (Ingenuity® Systems, [www.ingenuity.com](http://www.ingenuity.com)). A data set containing gene identifiers and corresponding expression values was uploaded into in the application. Each gene identifier was mapped to its corresponding gene object in the Ingenuity Pathways Knowledge Base.

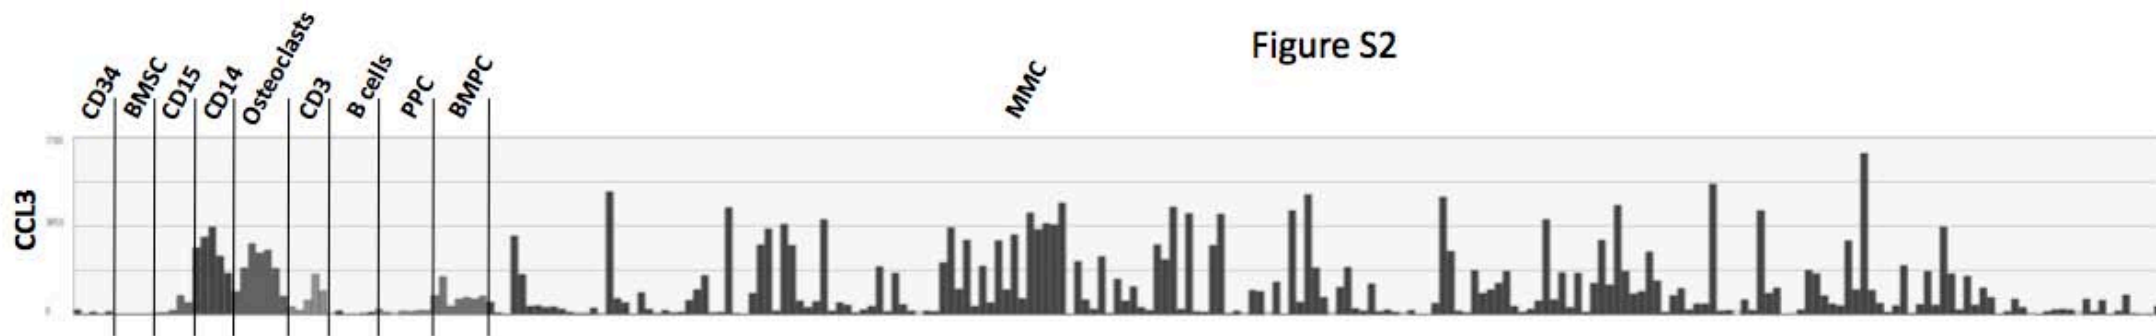

**Figure S2:** *MIP1 $\alpha$ /CCL3* gene expression in BM CD34 cells, BM stromal cells, purified BM CD15, CD14 and CD3 cells, osteoclasts, normal memory B cells, normal polyclonal plasmablasts, normal BM plasma cells (BMPC), and purified myeloma cells from patients with multiple myeloma (MM).

Figure S3

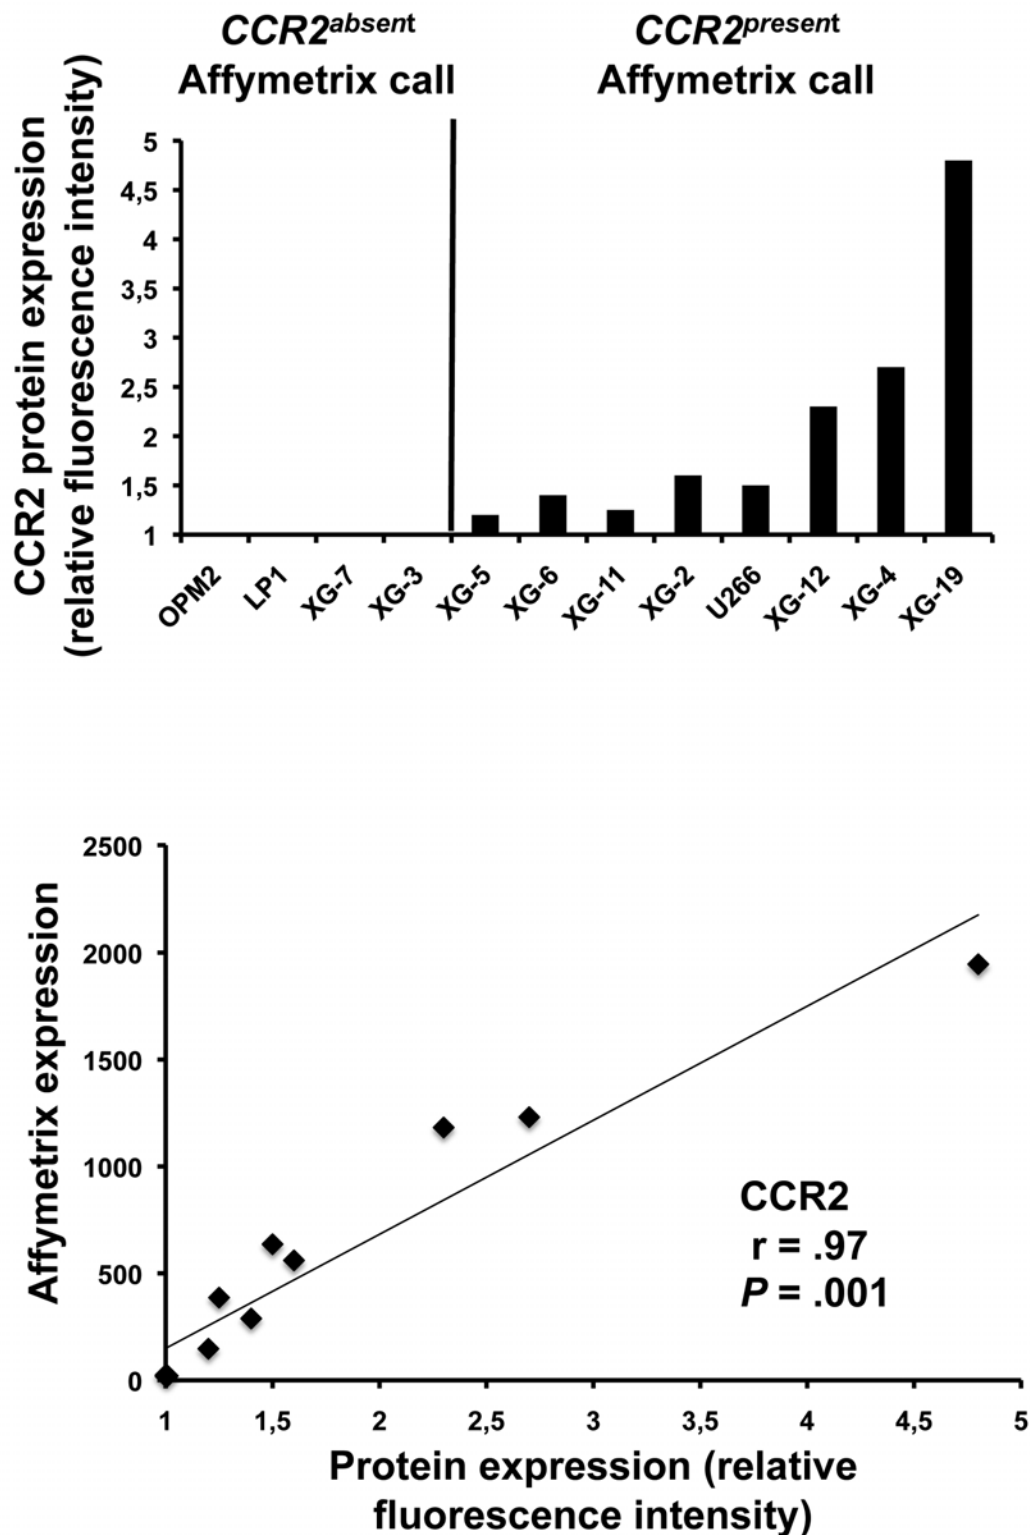

Figure S3. Validation of Affymetrix data.

CCR2 expression in 12 HMCLs was determined using Affymetrix microarrays or FACS analysis using labeling of MMC with a PE-conjugated anti-CCR2 MoAb, or PE-conjugated isotype matched control antibody. The coefficient of correlation between Affymetrix and protein expression (relative fluorescence intensity) was determined.

Figure S4

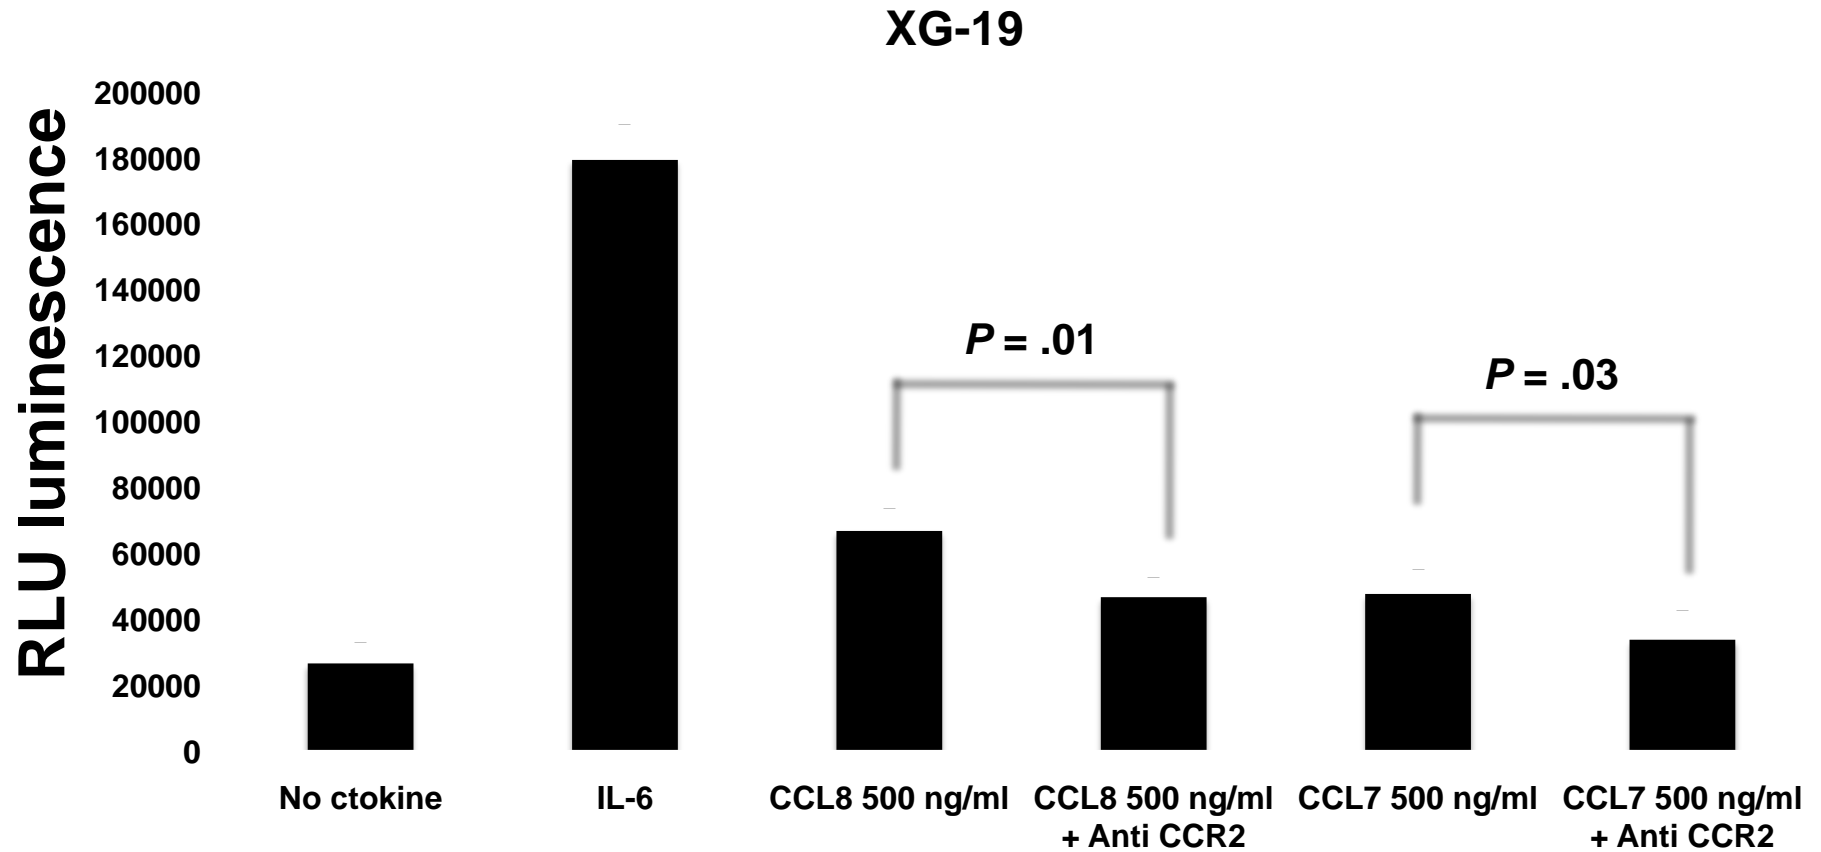

Figure S4: Chemokines targeting CCR2 stimulate the growth of MMC

XG-19 HMCL was IL-6 starved for 3 hours and cultured without cytokine, in the presence of IL-6 (3 ng/mL) or in the presence of 500 ng/ml of CCL7 or CCL8 with or without anti-CCR2 MoAb (10 µg/ml). Results are the mean ± SD values of the RLU fluorescence determined on sextuplet culture wells. Results are those of one experiment representative of 3.
